# Supplementary material for: Reprogramming the antigen specificity of B cells using genome-editing technologies
Source: eLife journal article supplement (doi:10.7554/elife.42995), 2019-01-16
Supplement: supp [file elife-42995-supp-v1.zip]

Archive with 20 entries (20 files):
- elife_poa_e42995_Figure_1_figure_supplement_2.pdf
- elife_poa_e42995_Figure_4_figure_supplement_1.pdf
- elife_poa_e42995_Figure_1_figure_supplement_1.pdf
- elife_poa_e42995_Figure_2_figure_supplement_1.pdf
- elife_poa_e42995_Figure_2_figure_supplement_8.pdf
- elife_poa_e42995_Transparent_Reporting_File.pdf
- elife_poa_e42995_Figure_2_figure_supplement_10.pdf
- elife_poa_e42995_Supplementary_file_1.docx
- elife_poa_e42995_Figure_2_figure_supplement_6.pdf
- elife_poa_e42995_Figure_2_figure_supplement_2.pdf
- elife_poa_e42995_Figure_2_figure_supplement_11.pdf
- elife_poa_e42995_Figure_2_figure_supplement_7.pdf
- elife_poa_e42995_Figure_1_figure_supplement_3.pdf
- elife_poa_e42995_Figure_1_figure_supplement_4.pdf
- elife_poa_e42995_Figure_2_figure_supplement_5.pdf
- elife_poa_e42995_Figure_3_figure_supplement_1.pdf
- elife_poa_e42995_Figure_3_figure_supplement_2.pdf
- elife_poa_e42995_Figure_2_figure_supplement_9.pdf
- elife_poa_e42995_Figure_2_figure_supplement_3.pdf
- elife_poa_e42995_Figure_2_figure_supplement_4.pdf
