# Supplementary material for: Reprogramming the antigen specificity of B cells using genome-editing technologies
Source: eLife journal article supplement (doi:10.7554/elife.42995), 2019-01-16
Supplement: supp [file elife-42995-supp-v1.zip › elife_poa_e42995_Figure_1_figure_supplement_1.pdf]

10 20 30 40 50 60 70 80 90 100 110

CDRL1 L2 CDRL3

buried surface area with Pq9 LC residue and Pq9 HC in Angstroms (A) 3UZS:

PG9 OSALTQPA-SVSGSPGQSITISCTGTSNDVG--GY-E-SVSWYQQHPGKAPKV IYDVKRPSGVSNRFGSGSGNTASLTISGLQAEDEGDYCKSLTS-TR--RRVFGTGTKLTVL  
1 SVELTQPP-SVSVSPGQTARITCSG--DALP--K-QYAYWYQKPGQAPVLV IYKDSERPISGIPERFSGSGGTTVTLTISGVQAEDEADYICQADS-SG--TYVFGTGTKLTVL  
2 SVELTQPP-SVSVSPGQTASITCSG--DKLG--D-KYAYWYQKPGQSPVLV IYEDSKRPSGIPERFSGSGGNTASLTISGLQAEDEADYICQADS-SG--TYVFGTGTKLTVL  
3 OSALTQPA-SVSGSPGQSITISCTGTSNDVG--SY-NLVSWYQKPGAPKLM IYEDSKRPSGVSNRFGSGSGNTASLTISGLQAEDEADYICSSYTS-S-TPVFGGSGTKLTVL  
4 OSALTQPA-SVSGSPGQSITISCTGTSNDVG--GY-NVSWYQKPGAPKLM IYEVSNRPSGVSNRFGSGSGNTASLTISGLQAEDEADYICSSYTS-S-TPVFGGSGTKLTVL  
5 SVELTQPP-SVSVAPGKTARITCSG--NNIG--S-KSVSWYQKPGQAPVLV IYDSDRPSGIPERFSGSGGNTATLTISRVEAGDEADYICQVWDSSD--HWVFGGSGTKLTVL  
6 OSALTQPP-SASGSPGQSVTISCTGTSNDVG--GY-NVSWYQKPGAPKLM IYEVSRPSGVPPDRFSGSGGNTASLTISGLQAEDEADYICSSYAG-NN--NLLFGGSGTRVTL  
7 SVELTQPP-SVSVSPGQTARITCSG--NNFG--N-KSVSWYQKPGQSPVLV IYDDIDRPSGIPERFSGSGGNTATLTISRVEAGDEADYICQVWDSSDHRDVFGGSGTKLTVL  
8 QAVLTQPP-SVSEAPRQRTISCTGSSNIG--N-NAVWYQKPGPCKLL IYDDLLPSGVSDRFGSGSGTSASLTISGLQSEDEADYICAAWDDSLN--GWVFGGSGTKLTVL  
9 OSALTQPA-SVSGSPGQSITISCTGTSNDVG--DY-DVSWYQKPGAPKLI IYEVSKRPSGVPPDRFSGSGKNTASLTISGLQAEDEADYICSSYTS-S-LDYVFGTGTKLTVL  
10 QVLTQPP-SVSGAPGQRTISCTGSSNVG--AG-YDVSWYQKPGAPKLV IYGNRNPSPGVPPDRFSGSGNSASLTITGLQAEDEADYICQSFDDSLR--GLVFGGSGTKLTVL  
11 OSALTQPA-SVSGSPGQSITISCTGTRSDVG--GY-DVSWYQKPGPCKLI IYEVTKRPSGIPDRFSGSGGNTASLTISGLQADDEADYICCSYAN-YD--ELILGSGTKLTVL

12 EIVLTQSPGTLSPGERATLSCRASQSV-SSS-Y--LAWYQKPGQAPRLL IYGASSRATGIPDRFSGSGGTDFTLTISRLEPEDFAVYICQYQYSS--P-PTFGGSGTKLE  
13 DIVMTQSPGTLSPGERATLSCRASQSV-SSS-Y--LAWYQKPGQAPRLL IYLGSNRASGVPPDRFSGSGGTDFTLTISRVEAEDVGVIYCMQALQ--P-YTFGGSGTKLE  
14 EIVLTQSPGTLSPGERATLSCRASQSV-SSS-Y--LAWYQKPGQAPRLL IYGASSRATGIPDRFSGSGGTDFTLTISRLEPEDFAVYICQYQYSS--P-PLYSGGSGTKLE  
15 EIVLTQSPGTLSPGERATLSCRASQSV-SSS-Y--LAWYQKPGQAPRLL IYGASSRATGIPDRFSGSGGTDFTLTISRLEPEDFAVYICQYQYSS--P-WTFGGSGTKLE  
16 DIVMTQSPGTLSPGERATLSCRASQSV-SSS-Y--LAWYQKPGQAPRLL IYLGSNRASGVPPDRFSGSGGTDFTLTISRVEAEDVGVIYCMQALQ--P-PRLTFGGSGTKLE  
17 DVVMTQSPGTLSPGERATLSCRASQSV-SSS-Y--LAWYQKPGQAPRLL IYLGSNRASGVPPDRFSGSGGTDFTLTISRVEAEDVGVIYCMQALQ--P-WTFGGSGTKLE  
18 DVVMTQSPGTLSPGERATLSCRASQSV-SSS-Y--LAWYQKPGQAPRLL IYLGSNRASGVPPDRFSGSGGTDFTLTISRVEAEDVGVIYCMQALQ--P-DTFGGSGTKLE  
19 DVVMTQSPGTLSPGERATLSCRASQSV-SSS-Y--LAWYQKPGQAPRLL IYLGSNRASGVPPDRFSGSGGTDFTLTISRVEAEDVGVIYCMQALQ--P-ETFGGSGTKLE

20 EIVLTQSPGTLSPGERATLSCRASQSV-SSS-Y--LAWYQKPGQAPRLL IYGASSRATGIPDRFSGSGGTDFTLTISRLEPEDFAVYICQYQYSS--P-LTFGGSGTKVD  
21 EIVLTQSPGTLSPGERATLSCRASQSV-SSS-Y--LAWYQKPGQAPRLL IYGASSRATGIPDRFSGSGGTDFTLTISRLEPEDFAVYICQYQYSS--P-A-FGGSGTKLE  
22 AIRMTQSPGTLSPGERATLSCRASQSV-SSS-Y--LAWYQKPGQAPRLL IYAASSLQSGVPPDRFSGSGGTDFTLTISLQPEDFAVYICQYQYSS--P-PSITFGGSGTKLE  
23 AIRMTQSPGTLSPGERATLSCRASQSV-SSS-Y--LAWYQKPGQAPRLL IYAASSLQSGVPPDRFSGSGGTDFTLTISLQPEDFAVYICQYQYSS--P-L-WTFGGSGTKVD  
24 DIVMTQSPGTLSPGERATLSCRASQSV-SSS-Y--LAWYQKPGQAPRLL IYAASSLQSGVPPDRFSGSGGTDFTLTISLQPEDFAVYICQYQYSS--P-RTFGGSGTKVE  
25 EIVLTQSPGTLSPGERATLSCRASQSV-SSS-Y--LAWYQKPGQAPRLL IYGASSRATGIPDRFSGSGGTDFTLTISRLEPEDFAVYICQYQYSS--P-WTFGGSGTKVD  
26 DIVMTQSPGTLSPGERATLSCRASQSV-SSS-Y--LAWYQKPGQAPRLL IYAASSLQSGVPPDRFSGSGGTDFTLTISLQPEDFAVYICQYQYSS--P-P-PTFGGSGTKVE  
27 AIRMTQSPGTLSPGERATLSCRASQSV-SSS-Y--LAWYQKPGQAPRLL IYAASSLQSGVPPDRFSGSGGTDFTLTISLQPEDFAVYICQYQYSS--P-YTFGGSGTKLE  
28 EIVLTQSPGTLSPGERATLSCRASQSV-SSS-Y--LAWYQKPGQAPRLL IYAASSLQSGVPPDRFSGSGGTDFTLTISLQPEDFAVYICQYQYSS--P-A-FGGSGTKVD  
29 DIVMTQSPGTLSPGERATLSCRASQSV-SSS-Y--LAWYQKPGQAPRLL IYAASSLQSGVPPDRFSGSGGTDFTLTISLQPEDFAVYICQYQYSS--P-P-PTFGGSGTKLE  
30 DIVMTQSPGTLSPGERATLSCRASQSV-SSS-Y--LAWYQKPGQAPRLL IYAASSLQSGVPPDRFSGSGGTDFTLTISLQPEDFAVYICQYQYSS--P-P-PTFGGSGTKLE  
CH01 EIVLTQSPGTLSPGERATLSCRASHNV-HPK-Y--FAWYQKPGQAPRLL IYGGSTRAGIPKFSGSGGTDFTLTISRVDPEDFAVYICQYQYSS--P-YTFGGSGTKVE  
PGT151 DIVMTQSPGTLSPGERATLSCRASQSV-SSS-Y--LAWYQKPGQAPRLL IYEVSNRPSGVSDRFGSGGTDFTLTISRVEAEDVGVIYCMQSKDF--P-LTFGGSGTKVD  
B12 EIVLTQSPGTLSPGERATLSCRASQSV-SSS-Y--LAWYQKPGQAPRLL IYGVSNRASGIPDRFSGSGGTDFTLTISRVEAEDVGVIYCMQSKDF--P-LTFGGSGTKVD  
PGT145 EVVITQSPGTLSPGERATLSCRASQSV-SSS-Y--LAWYQKPGQAPRLL IYAASSLQSGVPPDRFSGSGGTDFTLTISRVEAEDVGVIYCMQSKDF--P-LTFGGSGTKVD  
VRC01 EIVLTQSPGTLSPGERATLSCRASQSV-SSS-Y--LAWYQKPGQAPRLL IYAASSLQSGVPPDRFSGSGGTDFTLTISRVEAEDVGVIYCMQSKDF--P-LTFGGSGTKVD  
PGV04 EIVLTQSPGTLSPGERATLSCRASQSV-SSS-Y--LAWYQKPGQAPRLL IYAASSLQSGVPPDRFSGSGGTDFTLTISRVEAEDVGVIYCMQSKDF--P-LTFGGSGTKVD

Ramos-LLC 95  
Ramos (A) OSALTQPA-SVSGSPGQSITISCTGTSNDVG--GY-NVSWYQKPGAPKLM IYDVKRPSGVSNRFGSGSGNTASLTISGLQADDEADYICSYTNDSN--SQVFGGSGTKLTVL

PGT135(k) EIVMTQSPGTLSPGERATLSCRASQSV-SSS-Y--LAWYQKPGQAPRLL IYEVSKRPSGVPPDRFSGSGGTDFTLTISRVEAEDVGVIYCMQSKDF--P-LTFGGSGTKVD  
31(k) DIVMTQSPGTLSPGERATLSCRASQSV-SSS-Y--LAWYQKPGQAPRLL IYAASSLQSGVPPDRFSGSGGTDFTLTISRVEAEDVGVIYCMQSKDF--P-LTFGGSGTKVD

Lambda

Kappa
