# Supplementary material for: Reprogramming the antigen specificity of B cells using genome-editing technologies
Source: eLife journal article supplement (doi:10.7554/elife.42995), 2019-01-16
Supplement: supp [file elife-42995-supp-v1.zip › elife_poa_e42995_Figure_2_figure_supplement_1.pdf]

5 candidate guide RNAs tested/target site using the pCAG-eGxxFP recombination vector

| TARGET DNA cutting score<br>(pCAG-eGxxFP in 293T) |     | reference (synthesized) | 293T (PCR from gDNA) | RAMOS (PCR from gDNA) | representative<br>score<br>images:                                                    |
|---------------------------------------------------|-----|-------------------------|----------------------|-----------------------|---------------------------------------------------------------------------------------|
|                                                   |     |                         |                      |                       |                                                                                       |
| V781 promoter                                     |     |                         |                      |                       |                                                                                       |
| guide                                             | PAM |                         |                      |                       | 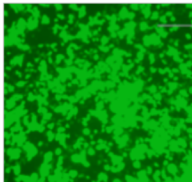  |
| CACACGGACGACCAATTAT                               | AGG |                         |                      |                       |                                                                                       |
| ATTGTGTCGTCCGTGTGTCA                              | TGG |                         |                      |                       |                                                                                       |
| GTTGATAGCGCTTCCTCCAC                              | TGG |                         |                      |                       |                                                                                       |
| CGACACAATTATAGGAGCTG                              | AGG |                         |                      |                       |                                                                                       |
| TCGAGTCGTAATCCTGTTAG                              | AGG |                         |                      |                       |                                                                                       |
| V434 promoter                                     |     |                         |                      |                       |                                                                                       |
| guide                                             | PAM |                         |                      |                       | 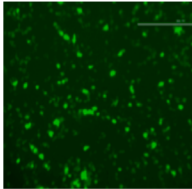 |
| TCACCCTGGGAGGTGTATGC                              | TGG |                         |                      |                       |                                                                                       |
| CTTTGTATGGATAGGTAAAA                              | AGG |                         |                      |                       |                                                                                       |
| CTTTTTACCTATCCATACAA                              | AGG |                         |                      |                       |                                                                                       |
| CCTTCAGCACATTTCTACC                               | TGG |                         |                      |                       |                                                                                       |
| CCAGGTAGGAAATGTGCTGA                              | AGG |                         |                      |                       |                                                                                       |
| 3' J6 SPLICE                                      |     |                         |                      |                       |                                                                                       |
| guide                                             | PAM |                         |                      |                       | 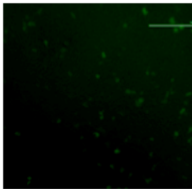 |
| GTCCTCGGGGCATGTTCCGA                              | GGG |                         |                      |                       |                                                                                       |
| GGTCCTCGGGGCATGTTCCG                              | AGG |                         |                      |                       |                                                                                       |
| CTCAGGTTGGGTGCGTCTGA                              | TGG |                         |                      |                       |                                                                                       |
| TCCTCGGGGCATGTTCCGAG                              | GGG |                         |                      |                       |                                                                                       |
| GCATTGCAGGTTGGTCCTCG                              | GGG |                         |                      |                       |                                                                                       |
