# Supplementary material for: Reprogramming the antigen specificity of B cells using genome-editing technologies
Source: eLife journal article supplement (doi:10.7554/elife.42995), 2019-01-16
Supplement: supp [file elife-42995-supp-v1.zip › elife_poa_e42995_Figure_2_figure_supplement_2.pdf]

[illegible][illegible]

Human IGH V7-81 promoter, IMGT reference sequence GenBank: AB019437 TTAGTGGAGGAAGCGCTATCAAC: 5' crisp guide sequence and PAM
