# Supplementary material for: Reprogramming the antigen specificity of B cells using genome-editing technologies
Source: eLife journal article supplement (doi:10.7554/elife.42995), 2019-01-16
Supplement: supp [file elife-42995-supp-v1.zip › elife_poa_e42995_Figure_2_figure_supplement_4.pdf]

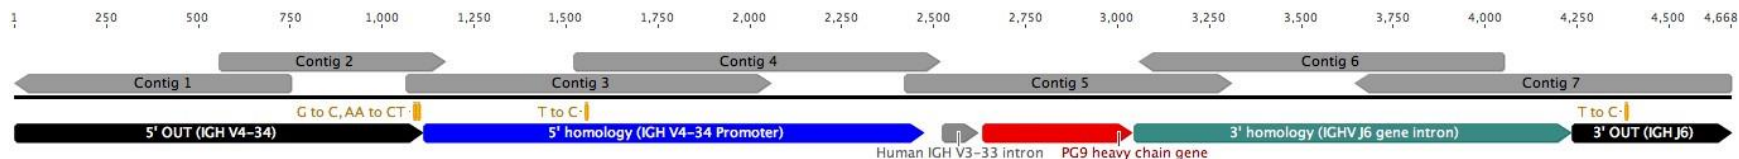

TGGCTCCAGGCATTTTAAATTCAACAGGTTATGTAACCAGGCTTTAAATTTGCACATCTTCGTGTTACCTTCATGACACAGTCAACTCCCATTATGTAAGAAATGGTGAGTG  
 CATTCCCAAGGGTCTTGACAGTTATAAAAAATAGACTTGATGAGGTGAGGAGTTGTTTAAATCCCCTCTGAAGAAGCAGCATCAACCCAACAACCACTCTCTCCCTCT  
 GTGACTAGAGCTCTGTCACAGGCCACATGGACCTAAATCCTTGATGGAGATTACAGGACTACGTAATGGACTGATCGTTTTTATGCTGTTAAATTAATAGGTGAGTCTG  
 CACTCCAGCCTGGGCAACAGAATAATCTTGCTGTAAAATACAAAAGAAAGATAAATTAATAGATACTGACTTTGACATTTCCGATAATAATATTTTCATAAACCGAATTTA  
 ATTATACCCACATTGTTACCTACACCTTCACTGAAAAGTTCTAGTTATGTTGAGTTCCATCAACACTCCACATGTTCAAATCTGGACATCCAAGAGAGTCTAGAGAATAAA  
 ACGCAATGAGGGCAGTGAACTTGCGTATATTCAGCACCTCTTAACCTCAGGAGGACTCAATACACCCTGGAACACTCTGCTTTTCTGAATGGCTCACAATGACTCCAGCTC  
 ACTCTCCAACCTCCTCAAACATCTGGCCTCTGTTTGCCCTAAGTTCACGCTCTGCTCTTAGTCTATGTTCTGAAGTCTTTGTAGAGGTGAAAATGAGCTGTCAGATGGATCT  
 TCCTTCTCACTGCAACATGGAATTTGCTATTTCACTTAATGACCACTCTTCCACAATGGTTGATTTCTTTGGCCTGTTCACTACTGGTGATTTTCAAGGGAATCTCAGTTGA  
 ATCTTACTGTTTTGATTTTGTCTCCATGACAATGTTGGGAAGTTTTCTTCTAGCAGCATAACATGATCTAGTGACCTGACACATTTGCAGCAACAACATACCTACAAATTC  
 AGAAGCTCTTTGGTTTTCTTTCCAGGAAATATAATTCCTTGCTCTTGATGTAGCAGCATCCTAGCATCCCTGTACACACCCACGTAAGATGTTCTACACGCCCTCAGAATAT  
 TCCCTGTAAATAAAAAAGTATCTCAGTTTCTCTCAATGTTTCATAATTCTCCTGAGGGTGAGGAAGTACTTCTGGGTCTGCTCAAACAAATGGCCAGAGACCACCTGGT  
 AGGTAGGTAAGGAGCTCACCTCGCTCTGGATATTGAGTCTGTCTCTTCCCTCTGTCTCATAGAAGGCCAGCCCACTTGTTGAGTCTCTAAGAAGAGAGCCAGGTTT  
 ATCCAGATTATACAACACAACCAGCTTCTGATGACTCTCCTGTTACAACATCCATGGAGATATTTGTGTATTATATAATTCACCAAATAATGTGAAATGCCAAGTTGCA  
 ATACTGCACACCCTAGGGTATGTTCTTGCAATTGAGCGGAGGAGAAATCTTTTCAGAGACAGATGGATCTGAATTGGTAAATATGTGGGTACGAATTCTGGGCTTGAGTGT  
 CATTGTCCAGCCATGTTTCACAGGTGTGACCTGTGAGGGAAGAACCAGAGTTCCTGTTCTCTCAGAGGGTAGAGCTCACAGAGGTCCTCTCTGGTCCCAGGAAAGGTA  
 ATTTCACTAATCTTGGTGATGAGACTATCCTCCAGTGCTGATGTACTATAGAGTTTTCATCTGAAGCTGTCACTGCTATCCCCAATGTACATCTTTTACACAGAAATGTTTA  
 GAGTGCAGGCATATTCTCAGGGTTACACATTGAGAAGGATGGAGATATATTCTACTCCTTCTGAGATCTCACACACAATCTCAAATGTTCAAAGAGTCTCAGAAGGG  
 CAGCTCTCAGGTAATTTAAAAATAAACCCTTCTGGGACAGGTAGCATCCTTCTAACCATGATGGATGTTCTGAACACAGTACACATTGCATGGATCCAGGTTTGTCT  
 CAATTCAGTGTGATTATTACACTCAGCAGCTGTTTCAATATGTCTGAAGGGGTAAATGACAATTTAGGTGACCTGGGTGTATGGTTGGTGTTATATGAATCTTTAAATGTAG  
 AACAGTATTAAGTATTCCAAATCTGTCTTGTATCCATGATCACACTTGTCTCCAGACCAGCTCCTTCAGCACATTTCTACCTTTAAGAAGAGGACTCTGGGTTTGGT  
 GAGGGGAGGCCACAGGAAGAGAAGTGAATCTCAGAGGGCACAGCCAGCATAACCTCCAGGGTGAGCCAAAAGACTGGGGCCTCCCTCATCCCTTTTACCTATCC  
 ATACAAAGGCACCACCACATGCAATCCTCACTTAGGCACCCACAGGAAATGACTACACATTTCTTAAATTCAGGGTCCAGCTCACATGGGAAGTGCTTTCTGAGAGT  
 CATGGACCTCCTGCACAAGAATGAGGAGTTTGGGCTGAGCTGGGTTTTCTCGTTGCTCTTTTAAAGAGGTGATTATGGAGAAATAGAGAGACTGAGTGTGAGTGAACAT  
 GAGTGAGAAAAAAGTGGATTGTGTGGCATTCTGATAACGGTGTCTCTGTTTGCAGGTGTCAGTGTGAGGATTAGTGGAGTCTGGGGGAGGCGTGGTCCAGCCTG  
 GGTCTCCCTGAGACTCTCCTGTGACGCTCCGGATTGCACTGAGTACAGCAAGGCATGCACTGGGTCCGCCAGGCTCCAGGCCAGGGGCTGGAGTGGGTGGCATTAT  
 TAAATATGATGGAAGTGAGAAATATCATGCTGACTCCGTATGGGGCCGACTCAGCATCTCCAGAGACAATTCCAAGGATACGCTTTATCTCCAATGAATAGCCTGAGAG  
 TCGAGGACACGGCTACATATTTTTGTGTGAGAGAGGCTGGTGGGCCCGACTACCGTAATGGGTACAACATTAACGATTCTATGATGGTTATTATAACTACCACTATATGG  
 ACGTCTGGGGCAAAGGGACCACGGTACCGTCTCCTCAGGTAAGAATGGCCACTCTAGGGCCTTGTCTGCTACTGCCTGTGGGGTTTCTGAGCATTGCAGGTTGG  
 TCCTCGGGGCATGTTCCGAGGTTGGACCTGGGCGGACTGGCCAGGAGGGGACGGGCACTGGGGTGCCTGAGGATCTGGGAGCCTCTGTGGATTTCCGATGCCTTTGG  
 AAAATGGGACTCAGGTTGGGTGCGTCTGATGGAGTAAGTGAAGCTGGGGGCTTGGGGAGCCACATTTGGACGAGATGCCTGAACAAACCAAGGGGCTTAGTGATGGCTG  
 AGGAATGTCTCAGGAGCGGTGTCTAGGACTGCAAGATCGTGCACAGCAGCGAATCGTGAATATTTTCTTGAATATGAGGTGCGCTGTGTGTCACCTGCAT  
 CTTAAATCTTTATTGGCTGGAAGAGAAGTGTGCGAGTGGGTGAATCCAGCCAGGAGGACGCGTAGCCCGGTCTTATGAGAGCAGGCTTGGGGCAGGGGTAGC  
 CCAGAAACGGTGGCTGCCGTCTGACAGGGGCTTAGGGAGGCTCCAGGACCTCAGTGCCTTGAAGCTGGTTTCCATGAGAAAAGGATTGTTTATCTTAGGAGGCATGCTT  
 ACTGTTAAAAGACAGGATATGTTTGAAGTGGCTCTGAGAAAAATGGTTAAGAAAATTATGACTTAAAAATGTGAGAGATTTTCAAGTATATTAATTTTTTAACTGTCCAA  
 GTATTTGAAATCTTATCATTGATTAAACCCCATGAGTGATATGTGTCTGGAATTGAGGCCAAAGCAAGCTCAGCTAAGAAATACTAGCACAGTGCTGTGGCCCCGATG  
 CGGGACTGCGTTTTGACCATCATAAATCAAGTTATTTTTTAAATTAATTGAGCGAAGCTGGAAGCAGATGATGAATTAGAGTCAAGATGGCTGCATGGGGGTCTCCGGCA  
 CCCACAGCAGGTGGCAGGAAGCAGGTCAACGCGAGAGTCTATTTAGGAAGCAAAAAAACACAATTGGTAAATTTATCACTTCTGGTTGTGAAGAGGTGGTTTTGCCAG  
 GCCAGATCTGAAAGTGCTCTACTGAGCAAAACAACACCTGGACAATTTGCGTTTCTAAAATAAGGCGAGGCTGACCGAACTGAAAAGGCTTTTTTAACTATCTGAAT  
 TCATTTCAAATCTTAGCTTATCAACTGCTAGTTTGCAACACAGCATCAACTCTAACTGCATTTTAAAGTAAGATGTTTAAAGAAATTAACAGTCTTAGGGAGA  
 GTTTATGACTGTATTCAAAAAGTTTTTAAATTAGCTTGTATCCCTTCATGTGATACTAATCTCAAATACTTTTTCGATACCTCAGAGCATTATTTTCAATGACTGTGTT  
 ACAATCTTTTATAGTTAACTCGTTTTCTTTGTGATTAAGGAGAAACACTTTGATATTCTGATAGAGTGGCCTTCATTTTAGTATTTTCAAGACCACTTTCACTACTCAC  
 TTAGGATAAGTTTTAGGTAAAATGTGCATCATTATCCTGAATTATTTAGTTAAGCATGTTAGTTGGTGGCATAAGAGAAAACTCAATCAGATAGTGCTGAAGACAGGAC
