# Supplementary material for: Reprogramming the antigen specificity of B cells using genome-editing technologies
Source: eLife journal article supplement (doi:10.7554/elife.42995), 2019-01-16
Supplement: supp [file elife-42995-supp-v1.zip › elife_poa_e42995_Figure_4_figure_supplement_1.pdf]

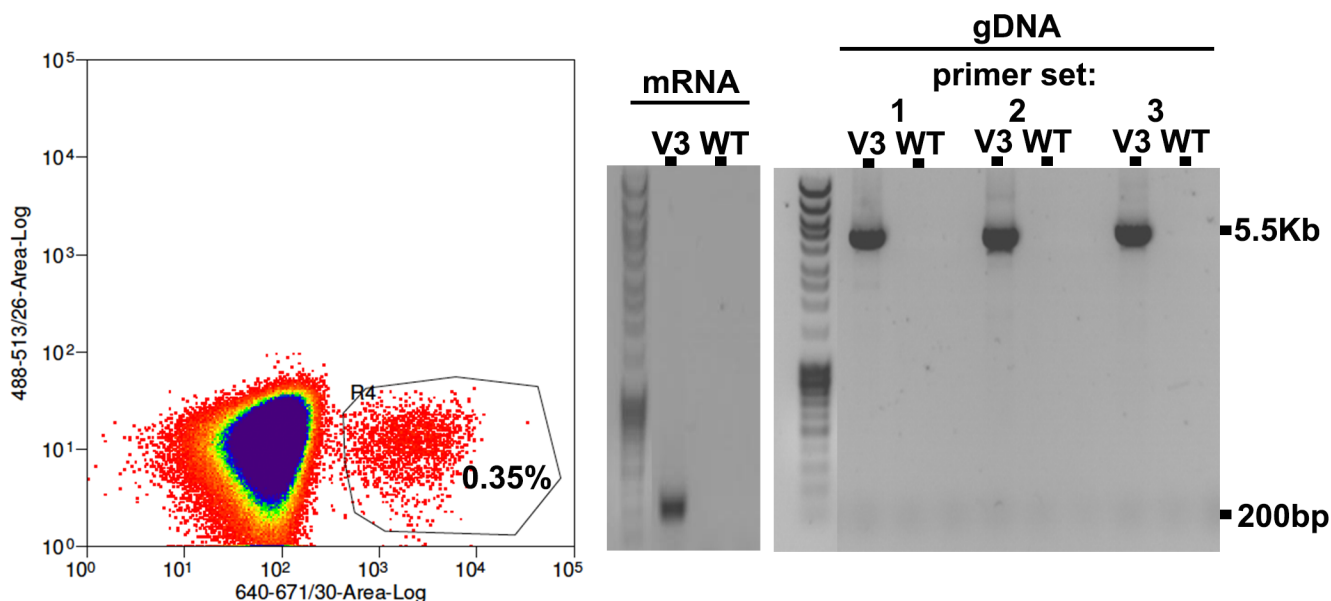

### V374p PG9HC Donor DNA:

AAAAAGTCCATTTTCTCTGATTAAACAGTTATTGTTGATTTTATTCTTGTGTAAAAAAGAAATTCTCATCTATGTACATTTCA  
AACCTGAATAACAAAATTTTATTAACACCAAAAAATAATAAAGAATCCAAATATTTATCAGCTGCCTAATAGAAAAACAAA  
TCATGGTAACATTGTTCCGTGGAATATTACCCATCATTCAATAAAGGGAATGTCTGATACACAAAAATAAGAAGATAAAAT  
ATCAAGTATTTAAATTGAGTAAAAAAGCCAAACAAATAAGAGATATGTATGATTCTATTTTAAAAATCTGGAAAAATGAAA  
ACTGATCTAAAGTAATATAAAGAAGATTAGTAGTTTCTGGGAATATGTTGGCAGAAGGGAAGGAGAAAGGATAAGGAAA  
TAGAAATAGGAAGTAGAAGGACAGAAAAAGATTGAGGGAATTTCACTTGTCCACCTTCCCTTATAATGGTAATAGTTATGC  
CATGATTATCAGTTTACACTTAAATATGTAAAGTTTATAATCTGTCAATCAAATCTTATAAAATGTATTATGAGGAAACAA  
GTTGAAAAATTAGACAATGTAGGAGTGACAGAAAGATAGATAGATGAGTATGTTGAATGTCAGAGATACCTGAAAGTTTATCTA  
CCTGAACCTAGTTCTCTCCATAGTTTAAGGTAACAGGAGAGTGCAGGAAAAATCATCCATATTCTGATTAGGCAGTGGCT  
TCTGCAAAACCACACTAGGCCTGGCCGGCTGTGTCTGGAGTTGGCTAAGGGAGGAGTCAAGGGCCAGTGGTGAGAAGTGC  
AGGCCAGATACCCAGAACTCACTCATCCAGACATGAGCTCTTAGATACACAGAGAGCCCATCCATGTGTGGATTATCTT  
ACATCTGTAAAGTAGAGAACATTGACTCTTACAGAACATAATTTACACACATAGGTAATCTGAAAATAAGGTGATCAGTGTG  
AAGATTTTATCAGACAGTTCATATAAAGCACAATTTCTCAAATCCATTGTTGTCCACCATCTTCTCAGGACACTTTT  
ATCTGCCCTGGGTCCTGCTCTTTCTCAGGTGTCTCACCCAGAGCTTGATATATAGTAGGAGACATGCAAAATAGGGCCCT  
CACTCTGCTGAAAGAAAACAGCCCTGCGAGCTCTAAGAGAGGAGCCCAAGCCCTGGGATTCACAGCTGTTTCTGCTGCTG  
ATCAGGACTGCACACAGAGAATCACCATGGAGTTTGGGCTGAGCTGGGTTTTCTCGTTGCTCTTTTAAGAGGTGATTCA  
TGGAGAAATAGAGAGACTGAGTGTGAGTGAACATGAGTGAGAAAAACTGGATTGTTGTGTGGCATTCTGATAACGGTGTCTC  
TTCTGTTTGCAGGTGCCAGTGTGAGCGATTAGTGGAGTCTGGGGAGGCGTGGTCCAGCCTGGGCTGCTGCTGCTGCTG  
TCCTGTGCAAGCGTCCGGATTGCACTTCAGTAGACAAGGCATGCACTGGGTCCGCCAGGCTCCAGGCCAGGGGCTGGAGT  
GGGTGGCATTATTAATATGATGGAAGTGAGAAATATCATGCTGACTCCGTATGGGGCCGACTCAGCATCTCCAGAGACA  
ATTCCAAGGATACGCTTTATCTCAAATGAATAGCCTGAGAGCTGAGGACACGGCTACATATTTTGTGTGAGAGAGGCTG  
GTGGGCCCGACTACCGTAATGGGTACAACCTATTACGATTCTATGATGGTTATTATAACTACCACATATGGACGCTGGGG  
CAAAGGGACACCGTCAACGCTCTCTCAGGTAAGAATGGCCACTCTAGGGCCTTTGTTTCTGCTACTGCCTGTGGGTTT  
CCTGAGCATTGCAGTTGGTCTCGGGGCACTGTTCCGAGGTTGGACCTGGGCGGACTGGCCAGGAGGGGACGGGCACTG  
GGGTGCCTTGAGGATCTGGGAGCCTCTGTGGATTTCCGATGCCTTTGGAAAAATGGGACTCAGGTTGGGTGCGCTGATGG  
AGTAACCTGAGCCTGGGGCTGGGGAGCCATTTGAGCAGATGCTGCTGAACAAACAGGGGCTTTCTGATGATGGCTGAG  
GAATGTGTCTCAGGAGCGGTGTCTGTAGGACTGCAAGATCGCTGCACAGCAGCGAATCGTGAATATTTCTTTAGAATTA  
TGAGGTGCGCTGTGTGTCAACCTGTCATCTTAAATCTTTTGGCTGGAAGAGAACTGTCGGAGTGGGTGAATCCAGCCA  
GGAGGGACGCTGATGCCCGGTCTTGATGAGAGCAGGTTTGGGGCAGGGGTAGCCAGAAACGGTGGCTGCCGTCTG  
ACAGGGGCTTAGGGAGGCTCCAGGACCTCAGTGCCTTGAAGCTGGTTTCCATGAGAAAAGGATTGTTTATCTTAGGAGGC  
ATGCTTACTGTTAAAGACAGGATATGTTTGAAGTGGCTTCTGAGAAAAATGGTTAAGAAAAATTATGACTTAAAAATGTGAG  
AGATTTTCAAGTATATTAATTTTTTAACTGTCCAAGTATTTGAAATCTTATCATTTGATTAACACCCATGAGTGATATGTGT  
CTGGAATTGAGGCCAAAGCAAGCTCAGCTAAGAAATACTAGCACAGTGTCTCGGCCCGATGCGGGACTGCGTTTTGAC  
CATCATAAATCAAGTTTATTTTTTAAATTAATTGAGCGAAGCTGGAAGCAGATGATGAATTAGAGTCAAGATGGCTGCATGG  
GGGTCTCCGGCACCCACAGCAGGTGGCAGGAAGCAGGTACCCGCGAGAGTCTATTTTAGGAAGCAAAAAACACAATTG  
GTAAATTTTCACTTCTGTTGTGAAGAGGTGGTTTTGCCAGGCCAGATCTGAAAGTGCTCTACTGAGCAAAACAACAC  
CTGGACAATTTGCGTTTCTAAATAAGGCGAGGCTGACCAGAACTGAAAAGGCTTTTTTAACTATCTGAATTTTCATTCCCA  
ATCTTAGCTTATC

Human IGHV V4-34 promoter, IMGT reference sequence GenBank: AB019439  
CCTTCAGCACATTTCTACCTT: 5' crispr guide sequence and PAM site mutation  
Human IGHV V3-33 Leader sequence. IMGT reference sequence GenBank: AB019439  
Human IGHV V3-33 intron, IMGT reference sequence GenBank: AB019439  
Human IGHV V3-33 gene, IMGT reference sequence GenBank: AB019439  
PG9 heavy chain VDJ gene, GenBank GU272045.1  
3' of the IGHV J6 gene (intron), IMGT reference sequence GenBank: AL122127  
TCCTCGGGGCACTGTTCCGAGGTT: 3' crispr guide sequence and PAM site mutation  
Human IGH V3-74 promoter, IMGT reference sequence GenBank: AB019437  
GAAAACAGCCCTGCGAGCTCTAA: 5' crispr guide sequence and PAM site mutation
