# Supplementary material for: Reprogramming the antigen specificity of B cells using genome-editing technologies
Source: eLife journal article supplement (doi:10.7554/elife.42995), 2019-01-16
Supplement: supp [file elife_poa_e42995_Figure_2_figure_supplement_6.pdf › elife_poa_e42995_Figure_2_figure_supplement_6.pdf]

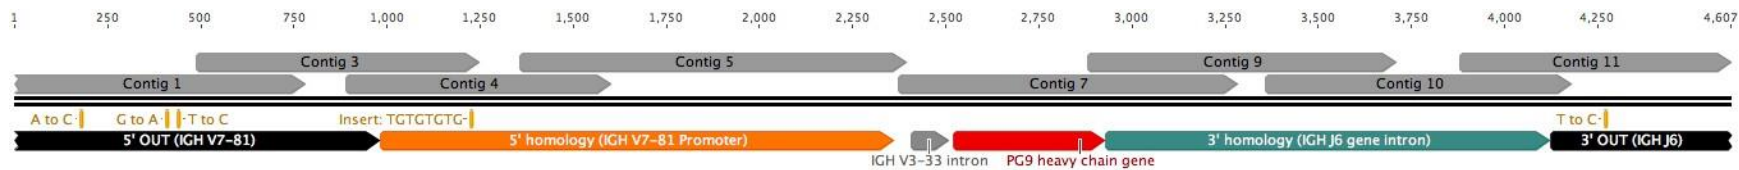

ACTACAGTTTGTATTGAATATTCATGCCAAAGAAGTTTTTTTCAAACCTTTTCAAGTAAAAAATTTTATCTTGCCTAGTTTGAAAATTACCATCTAAATTCACAAATAAGGTA  
 ATACAGTTTTAAAAGTGATGCTTGTCTTATTAGTTATTCAATTTATTAACAACAGACTGATATTTAACTATAAATACCATTGCACATTTAAGTGCCATACTGTTCTGGGATTTTT  
 TAAGGAATCAGAGAGACCGACTCTGTTACAGGAGGATATTTATTTAGGTTACAGGAGGATATTTATTTAGGTGCACCGGCCAAGTCGACATTAACATCCAAAGGACTG  
 AGCCAGAACAGAGTTTCAGTTACCTTTTAAGCATTTTGTGGGGTGGGAGAGGGACATCTGTGCAGGGTGAACTATACTACAGAAGTGAGAAACAAAGACAGCTATTCA  
 ATTGAAACATGTATTACATCATTTCTTCTTTTCAAGGAAAAACATGTTTTGCGACTTGAGTTTATCTTTCTAGTGACCTTGACGCTACACTGCTAGGGAATCAGGGTCTTCA  
 AAATGCCTGAGAAGGGAGGAGAGGTAAGGCTCATTAGCCACAGAAAAACAGGCAGTTAGTATTTTAAAGGACTCCAGCTCTTTCTCTTTTTCAGGGAGAATTGGGTTTTCT  
 TACATACAACTGAGTTTCTGCTTACACATTCTTTAATTTCTTTTAAATTCCTGTTTCAATACTTGACAAGAATGGCATTACATACAGTTTACCAAACATGTATTTAAATATAT  
 TTGCTTTTTTAATATTGGAATAGGCAGACATACACGTAGATCAGCATTATTTTGTACTAAAATCTCAAACGCAACACAATTTAAATTCATTAATAAATTAGAATAATATG  
 AAACAAATGGGTGTGTTGTTTTGGTGTTCACGTATGCATTCACCTTTTGCATGGGCACATGTATGAGTCTTCTGCTGGGCTGTTGTGCACGTTATGTGTGTTTGTATGACCAGGA  
 GGTTTTCAAATCATCATTAAATACATAGTTATATTAATCTTGGCAAGGCACCTTGATTTCTGTTTTCTTTAATTTCTGTTTGCAGAAAGTAGACATATTCAGTCTTAGTTCC  
 AGTGAGGGAGTGCTTTTTCATGAGAAAAATACCAGAAAAAGGGCAACATGGGGCCCAATGTAAAAATTAGCCACAATGTGTAAGTGTGTGTTGTTGTGTGTGTGTGTCTGAGTTGAATAGTAGAGTTGGAGTGGGCTTCTATCCACATGCACCTGCGCCTACAGGTATTATCAGGTACAATAATCAACTGCAGAACCTAAAGG  
 AAATAAGAGTCCCCCAAACCCCTGAAGAGTGTGGGTTCAACATGTGTCCAATGATTCAGTGCCTCTCGAGCTCCAGGAAACGGCTCCCTGGTGTATGCGTGAGATCTT  
 TTCTTGGGGTGTCCCTGCAGAGTTCGCTGGGTTTCTAAGGCTGATTCATTTCAAAGATGGTGTGAGAAGCATATGGTGTAAATAAAGCAGAATTCTGAGCCAGGGC  
 ACAGCCACTTTATACTGGGCTAGAGACACTGGTAGGAATATACTCTGTCAGCTCAGATAGAAACCTCCCTGCAGGGTGGGGGCAGGGCTGCAGGGGGCGCTCAGGACAC  
 ATCGAGCACAGTCTTCTGCCCCAGAGCAGGTGCACATGAGGCTGGGGAGAGGTTCTCTCAGGGCCTGGGACTTCCTTTAAAAATATCTAAAATAAGTATTTCAACAGGA  
 CTGCTGATGTTGTATAAATATCCTATTCAATTGTGAGCATTATCAAACCTGGATGTTGTAATGAGAACCATTTTATAATGGCGATTTCAACTGCTAGTTATCTTAATAA  
 TAGCATGGAGGTCAGGAAGAGATTACTTATATAAAGTGCAATTTTGGAGAGACACACTATCCCAAAATAACACATTCACATTAAGGTCTAGAAATGGTTC  
 ACGTTGCCCTGAGACATTCAAATGTGGGTTCAAAGTGAGGTGCTGTCCTCGGGGAGTTGTTCTTGTAGTGAGGAAGCGCTATCAACACAGAGTTACAGGGATGGGTAGG  
 GGATGCGTGGCCTCTAACAGGATTACGACTCGAACCCCTCAGCTCCTATAATTGTGTCGTCGCTGTGTCATGGATTTCTCTTTCTCATACTGGGTGAGGAATTGGTCTATTAA  
 ATAGCATCCTTCATGAATATGCAAATAACTGAGGGGAATATAGTATCTCTGTACCCTGAAAGCATCACCAACAACAACATCCCTCCTTGGGAGAATCCCTAGAGCACA  
 GCTCCTCACATGGAGTTTGGGCTGAGCTGGGTTTTCTCGTTGCTCTTTTAAAGAGGTGATTTCATGGAGAAATAGAGAGACTGAGTGTGAGTGAACATGAGTGAGAAAAAC  
 TGGATTTGTGTGGCATTCTTGATAACGGTGTCTTCTGTTTGCAGGTGTCCAGTGTGAGCGATTAGTGGAGTCTGGGGGAGGCGTGGTCCAGCCTGGGTCTGCTCCTGAG  
 ACTCTCTGTGCAGCGTCCGATTGCACTTCAGTAGACAAGGCATGCATGGGTCCGCGAGGCTCCAGGCCAGGGGCTGGAGTGGGTGGCATTATTAATATGATGGA  
 AGTGAGAAATATCATGCTGACTCCGTATGGGGCCGACTCAGCATCTCCAGAGACAATTCGAAGGATACGCTTTATCTCAAATGAATAGCCTGAGAGTCGAGGACACGGC  
 TACATATTTTTGTGTGAGAGAGGCTGGTGGGCCGACTACCGTAATGGGTACAACATTAACGATTTCTATGATGGTTATTATAAATACTACCACTATATGGACGTCTGGGGCAA  
 AGGGACCACGGTCACCGTCTCCTCAGGTAAGAATGGCCACTCTAGGGCCTTTGTTTTCTGCTACTGCCTGTGGGGTTTCTGAGCATTGCAGGTTGGTCTCGGGGCATG  
 TTCCGAGGTTGGACCTGGGCGGACTGGCCAGGAGGGGACGGGCACTGGGGTGCCTTGAGGATCTGGGAGCCTCTGTGGATTTCCGATGCCTTTGGAAAATGGGACTCA  
 GGTTGGGTGCGTCTGATGGAGTAACAGCCTGGGGGCTTGGGGAGCCACATTTGGACGAGATGCCTGAACAAACCAGGGGTCTAGTGATGGCTGAGGAATGTGTCTC  
 AGGAGCGGTGTCTGTAGGACTGCAAGATCGCTGCACAGCAGCGAATCGTGAATATTTCTTTAGAATTATGAGGTGCGCTGTGTGTCAACCTGCATCTTAAATCTTTATT  
 GGCTGGAAAGAGAAGTCTCGGAGTGGGTGAATCCAGCCAGGAGGGACGCGTAGCCCCGGTCTTGATGAGAGCAGGGTTGGGGGCAGGGGTAGCCAGAAACGGTGGC  
 TGCCGTCTGACAGGGGCTTAGGAGGCTCCAGGACCTCAGTGCCTTGAAGCTGTTTCCATGAGAAAAAGGATTTTATCTTAGGAGGCATGCTACTGTTAAAAGACA  
 GGATGTCTTTGAAGTGGCTTCTGAGAAAAATGGTTAAGAAAAATTATGACTTAAAAATGTGAGAGATTTTCAAGTATATTAATTTTTTAACTGTCCAAGTATTTGAAATCTT  
 ATCATTTGATTAACACCCATGAGTGATATGTGTCTGGAATTGAGGCCAAAGCAAGCTCAGCTAAGAAATACTAGCACAGTGCTGTGCGCCCCGATGCGGGACTGCGTTTT  
 GACCATCATAAATCAAGTTTATTTTTTAAATTAATTGAGCGAAGCTGGAAGCAGATGATGAATTAGAGTCAAGATGGCTGCATGGGGGTCTCCGGCACCCACAGCAGGTG  
 GCAGGAAGCAGGTACCGCGAGAGTCTATTTTAGGAAGCAAAAAACACAATTGGTAAATTTATCACTTCTGGTTGTGAAGAGGTGGTTTTGCCAGGCCAGATCTGAA  
 AGTGCTCTACTGAGCAAAACAACACCTGGACAATTTGCGTTTCTAAAATAAGGCGAGGCTGACCGAAACTGAAAAGGCTTTTTTAACTATCTGAATTTCAATTCATCTT  
 AGCTTATCAACTGCTAGTTTGTGCAACAGCATATCAACTTCTAACTGCATTCATTTTAAAGTAAGATGTTTAAAGAAATTAACAGTCTTAGGGAGAGTTTATGACTGTAT  
 TCAAAAGGTTTTTAAATTAGCTTGTATCCCTCATGTGATAACTTAATCTCAAATACTTTTCGATACCTCAGAGCATATTTTCAATGACTGTGTTTCAATCTTTTAGG  
 TCAACTCGTTTTCTTTGTGATTAAAGGAGAAACACTTTGATAATCTGATAGAGTGGCCTTCATTTAGTATTTTCAAGAGCACTTTTCACTACTCACTTTAGGATAAGTTT  
 TAGGTAAAATGTGCATCATTATCCTGAATTATTTAGTTAAGCATGTTAGTTGGTGGCATAAGAGAAAACTCAATCAGATAGTGCTGAAGACAGGACTGTGGAGACACCTT  
 AGAAGGACAGATTCTGTTCCGAATACCGATGCGGCGTC
