# Supplementary figures and images for: Reprogramming the antigen specificity of B cells using genome-editing technologies
Source: eLife journal article supplement (doi:10.7554/elife.42995), 2019-01-16

**A**

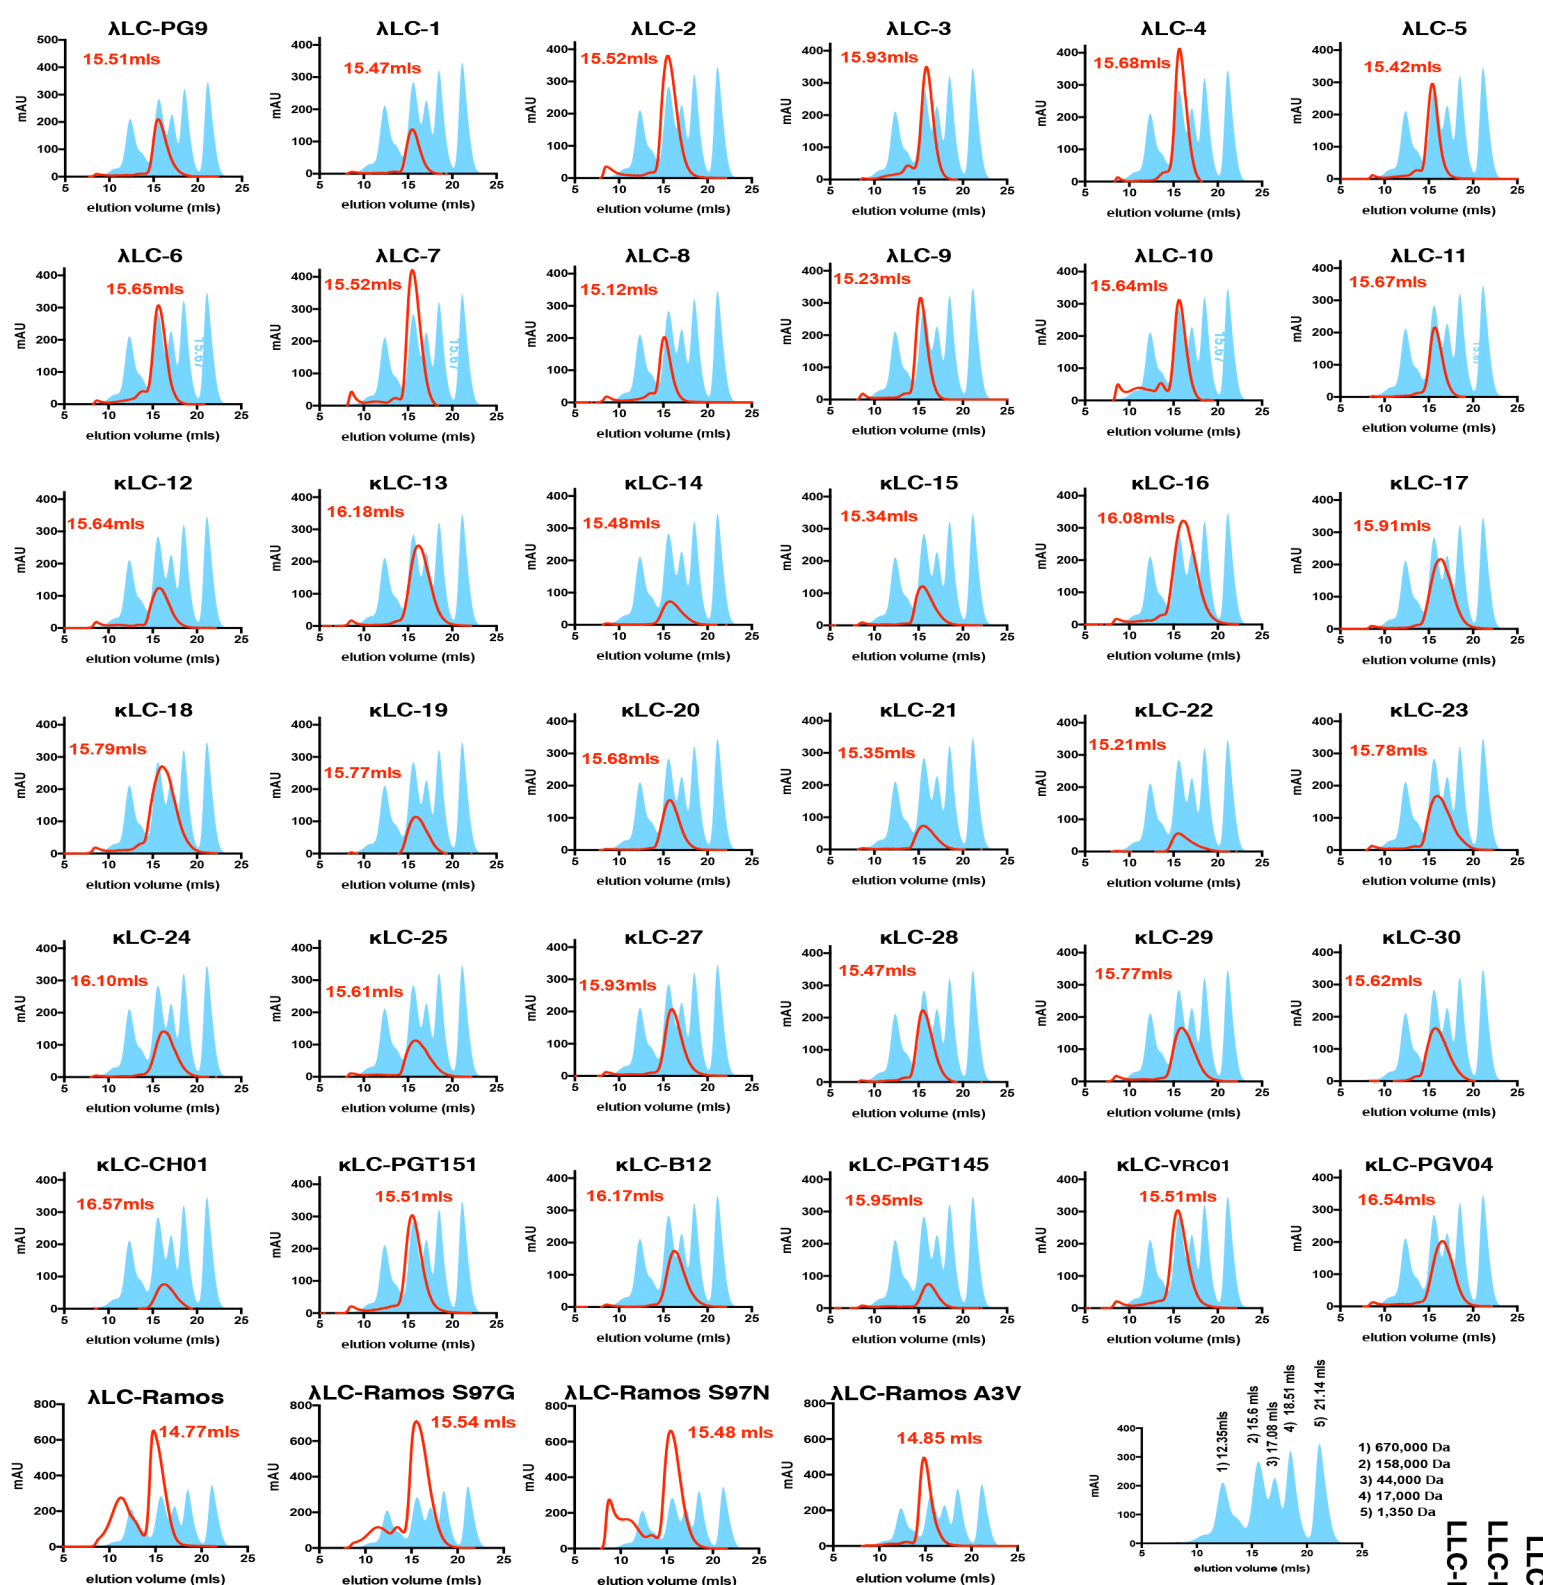

**B**

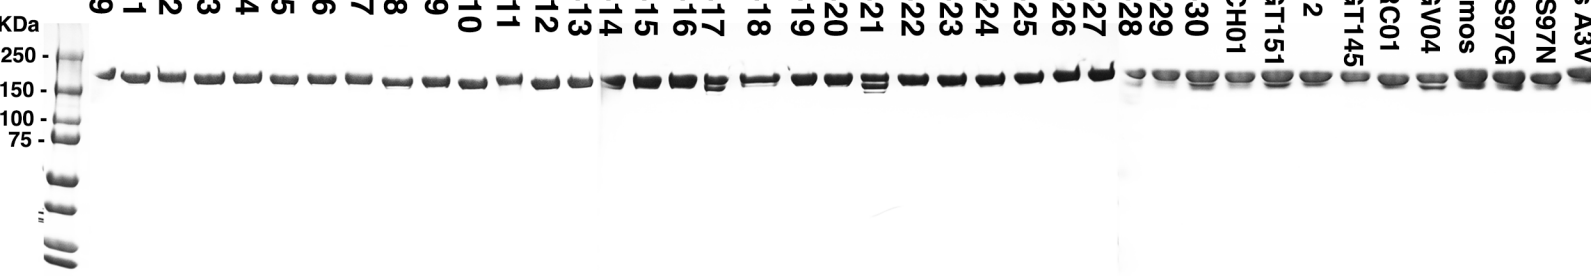

Supplement: supp [file elife-42995-supp-v1.zip › elife_poa_e42995_Figure_1_figure_supplement_2.pdf]

# V781 strategy

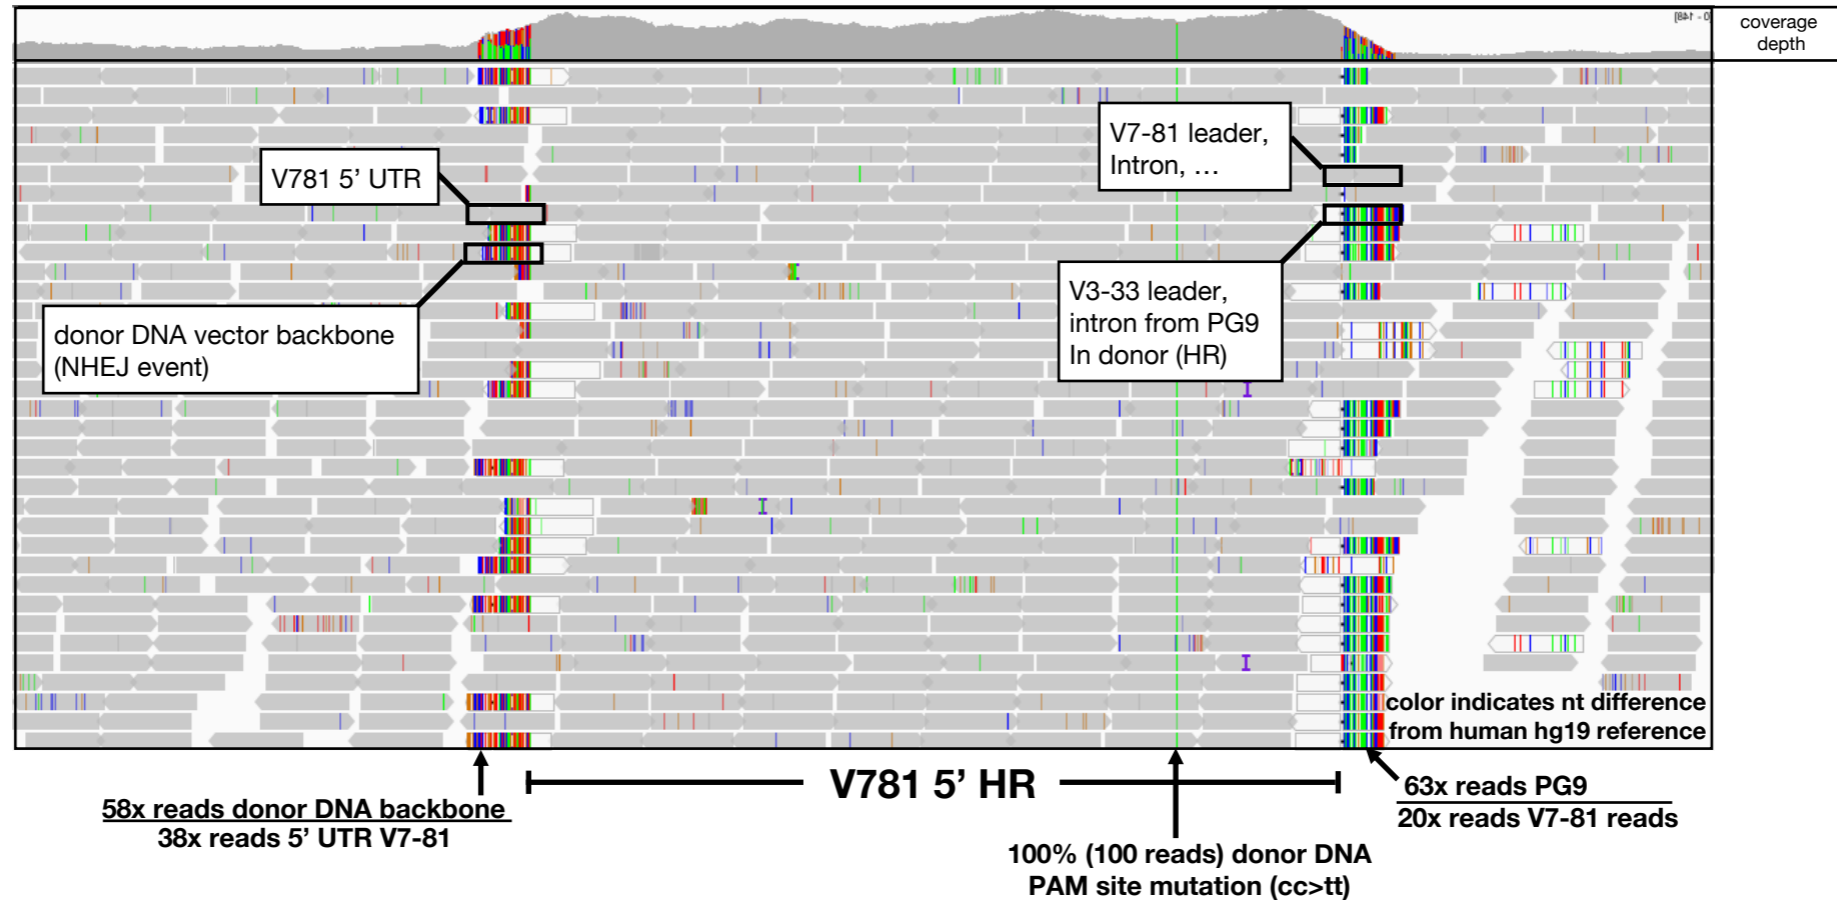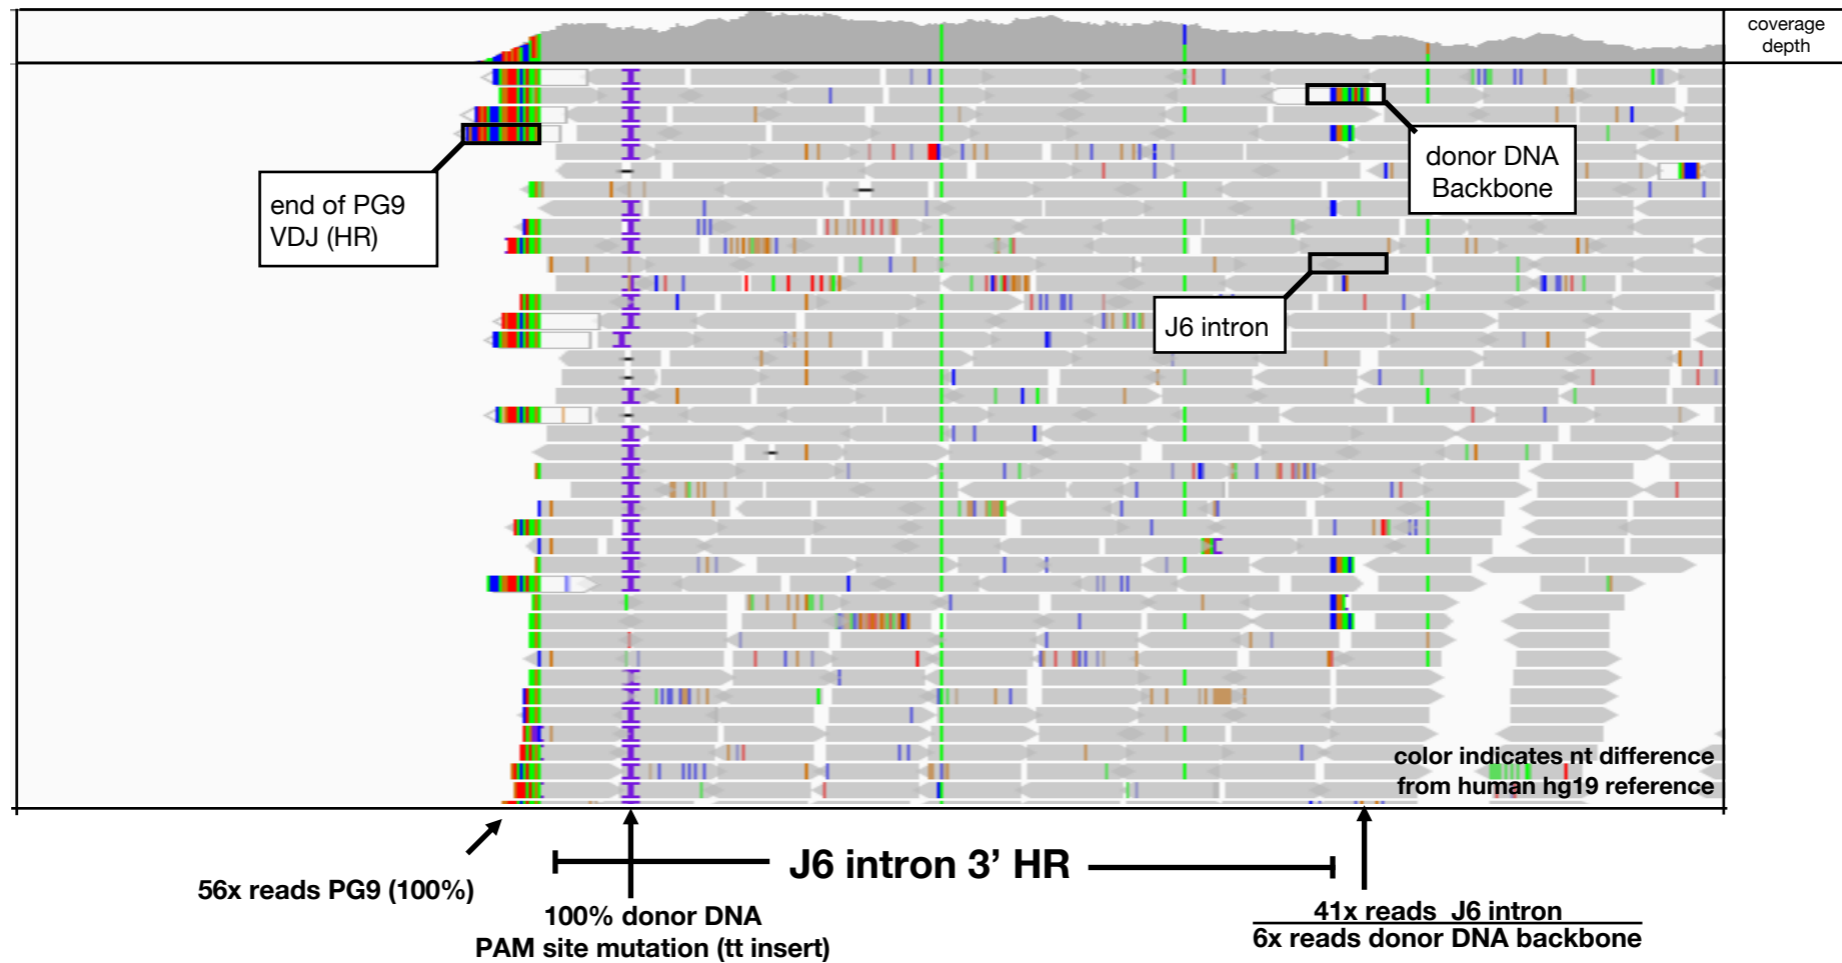

Supplement: supp [file elife-42995-supp-v1.zip › elife_poa_e42995_Figure_2_figure_supplement_8.pdf]

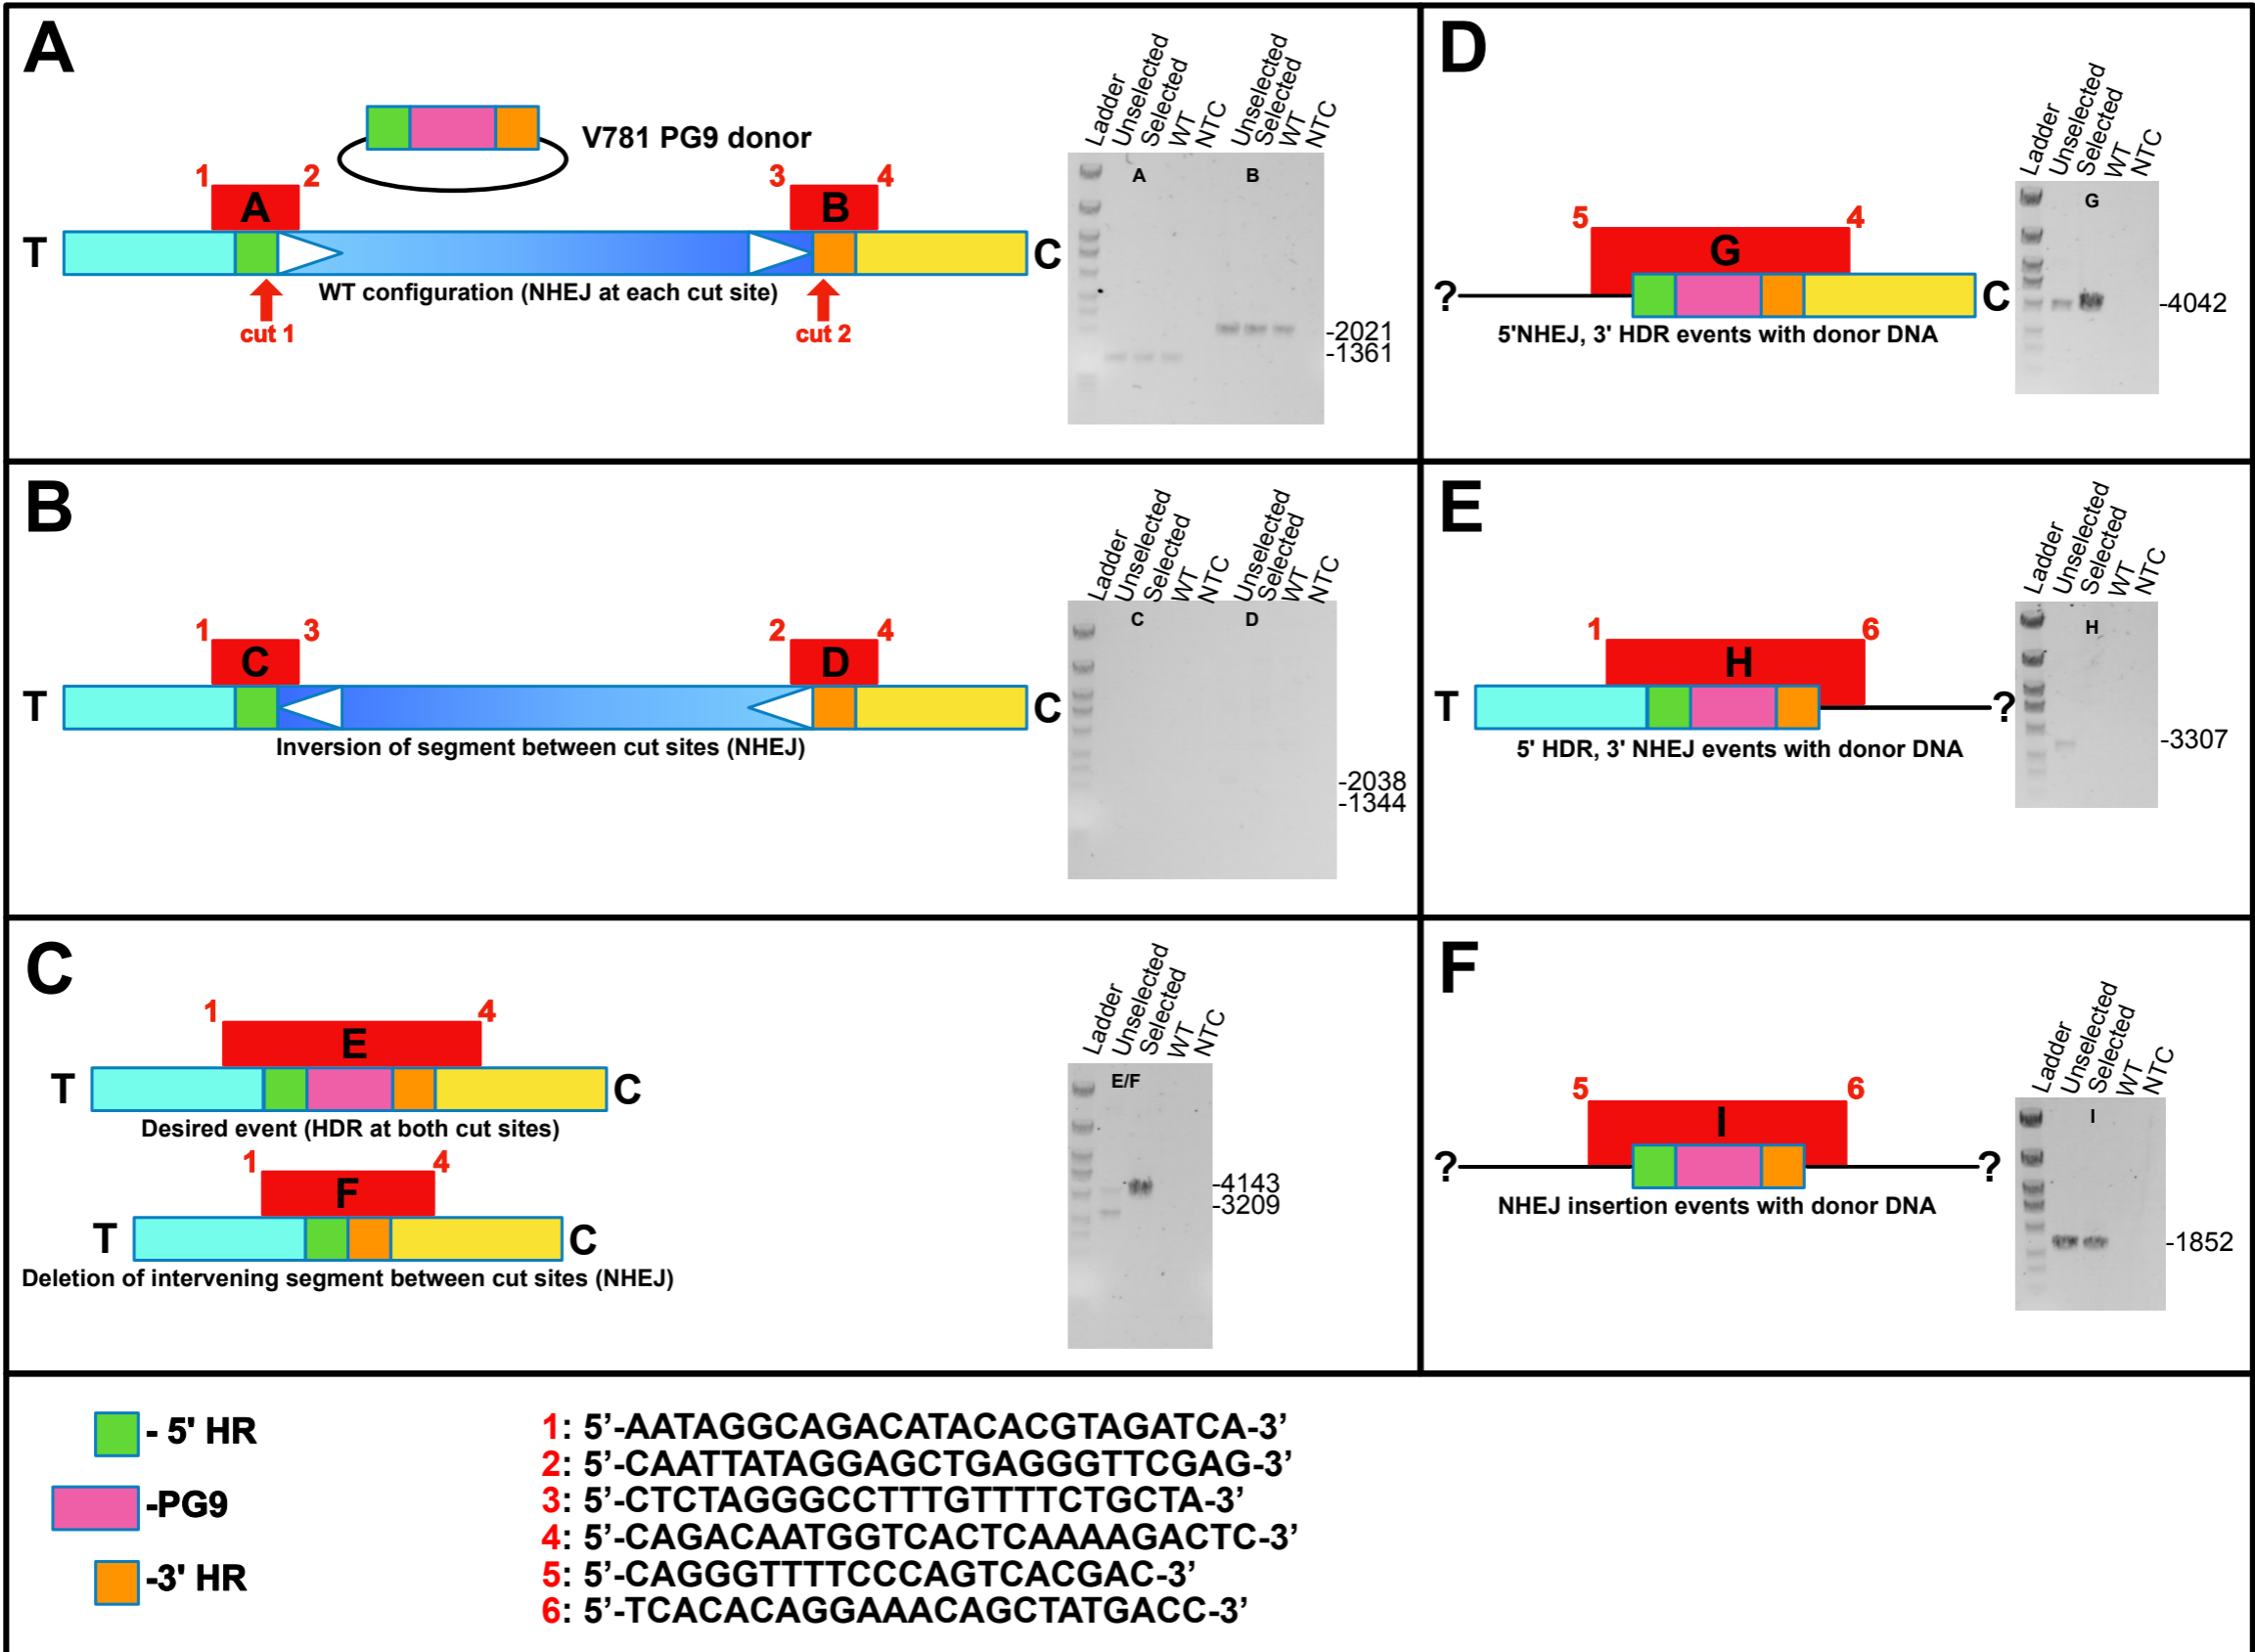

Supplement: supp [file elife-42995-supp-v1.zip › elife_poa_e42995_Figure_2_figure_supplement_10.pdf]

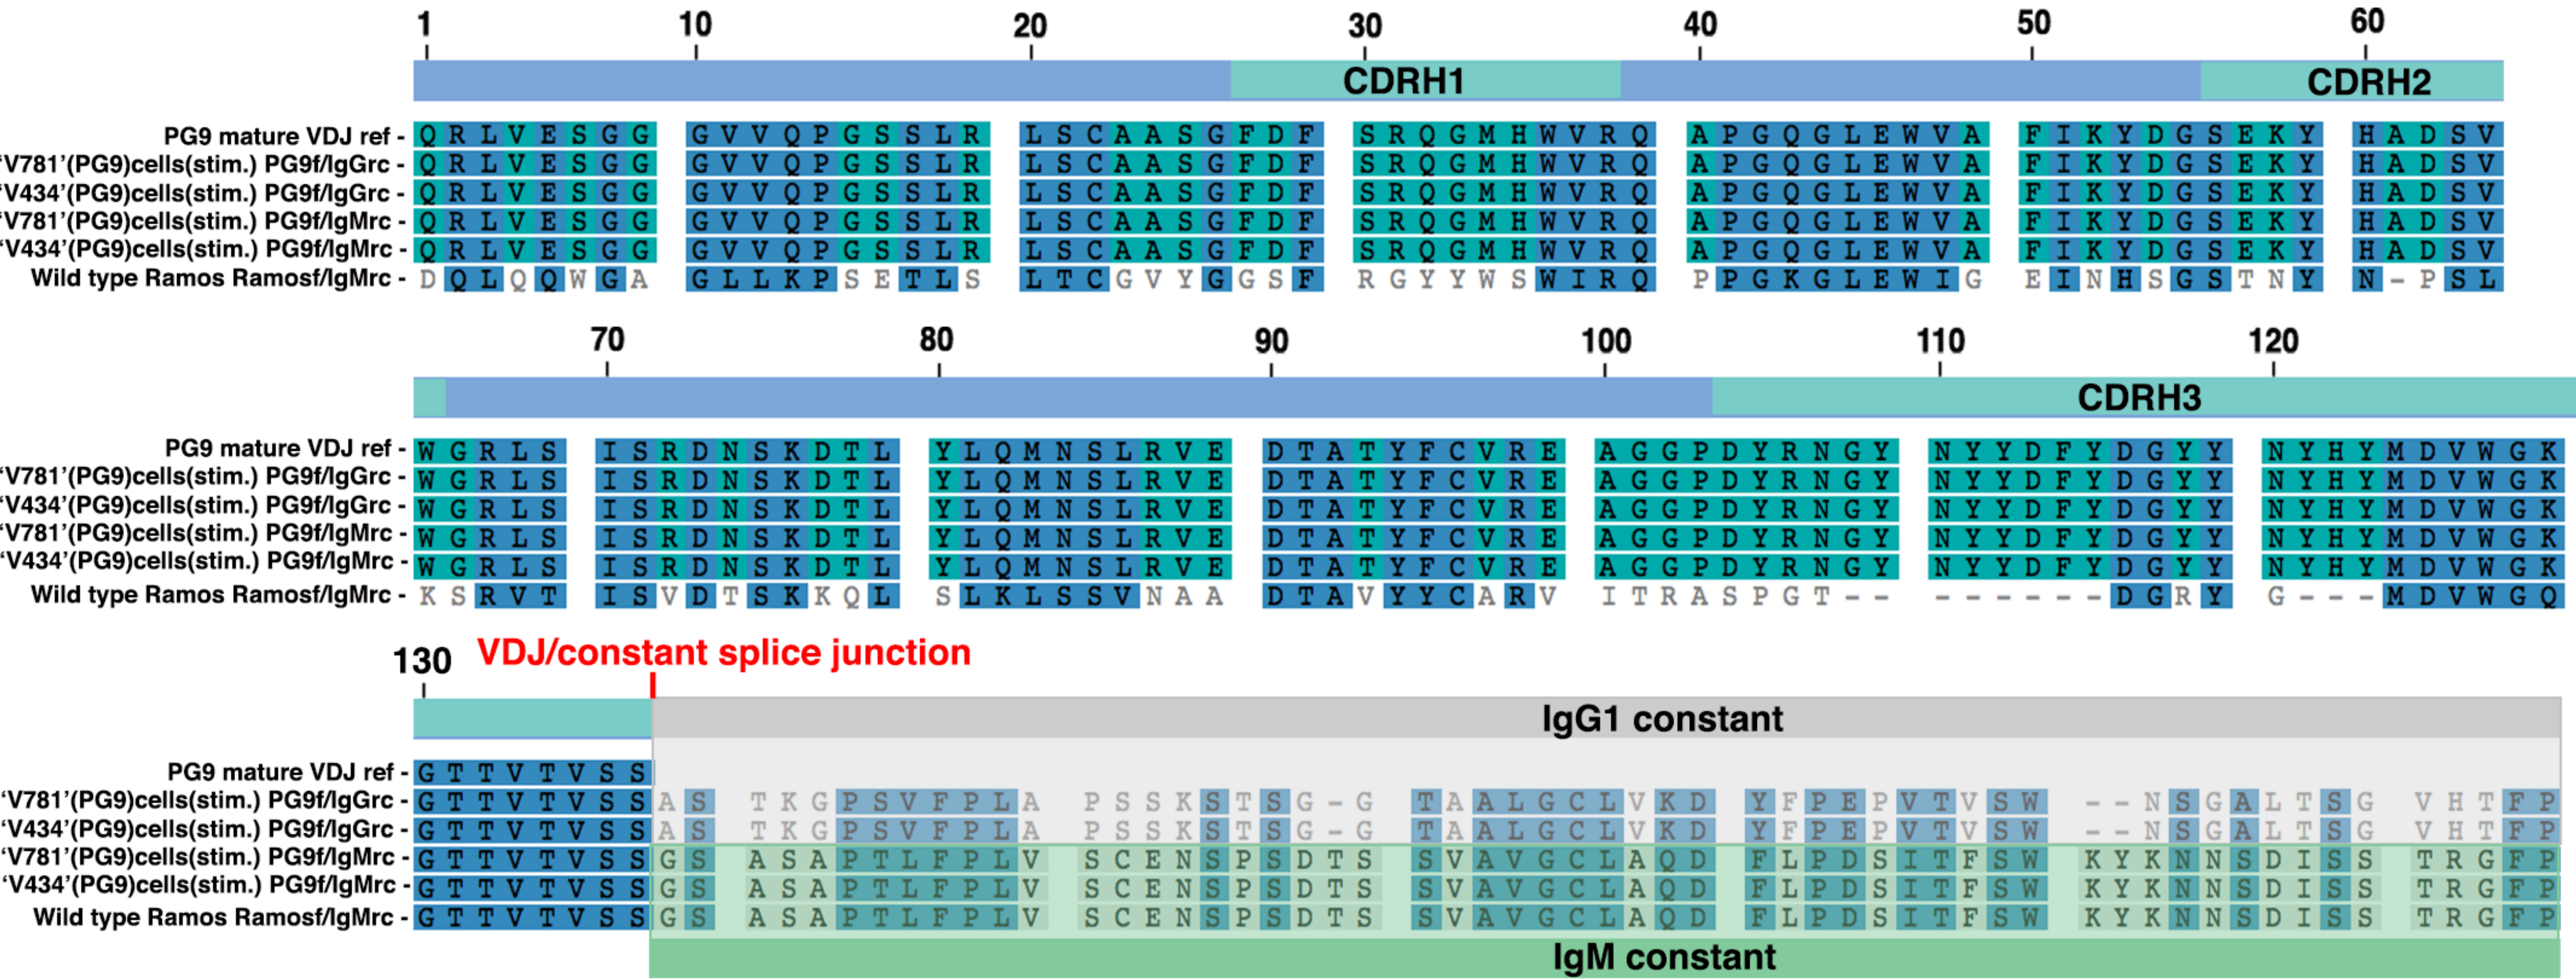

Supplement: supp [file elife-42995-supp-v1.zip › elife_poa_e42995_Figure_2_figure_supplement_11.pdf]

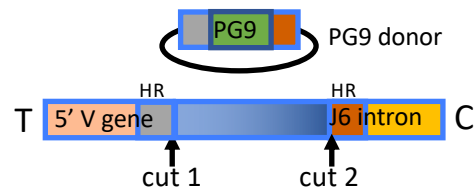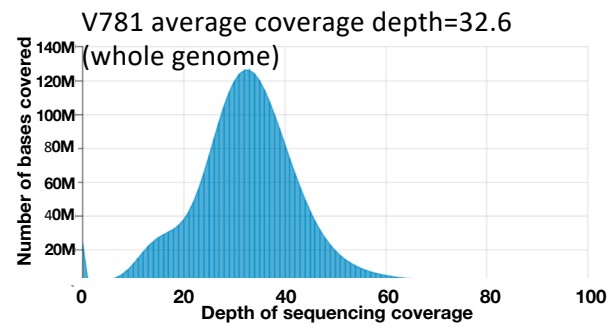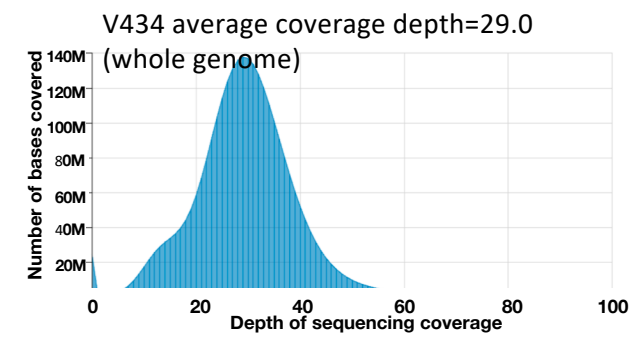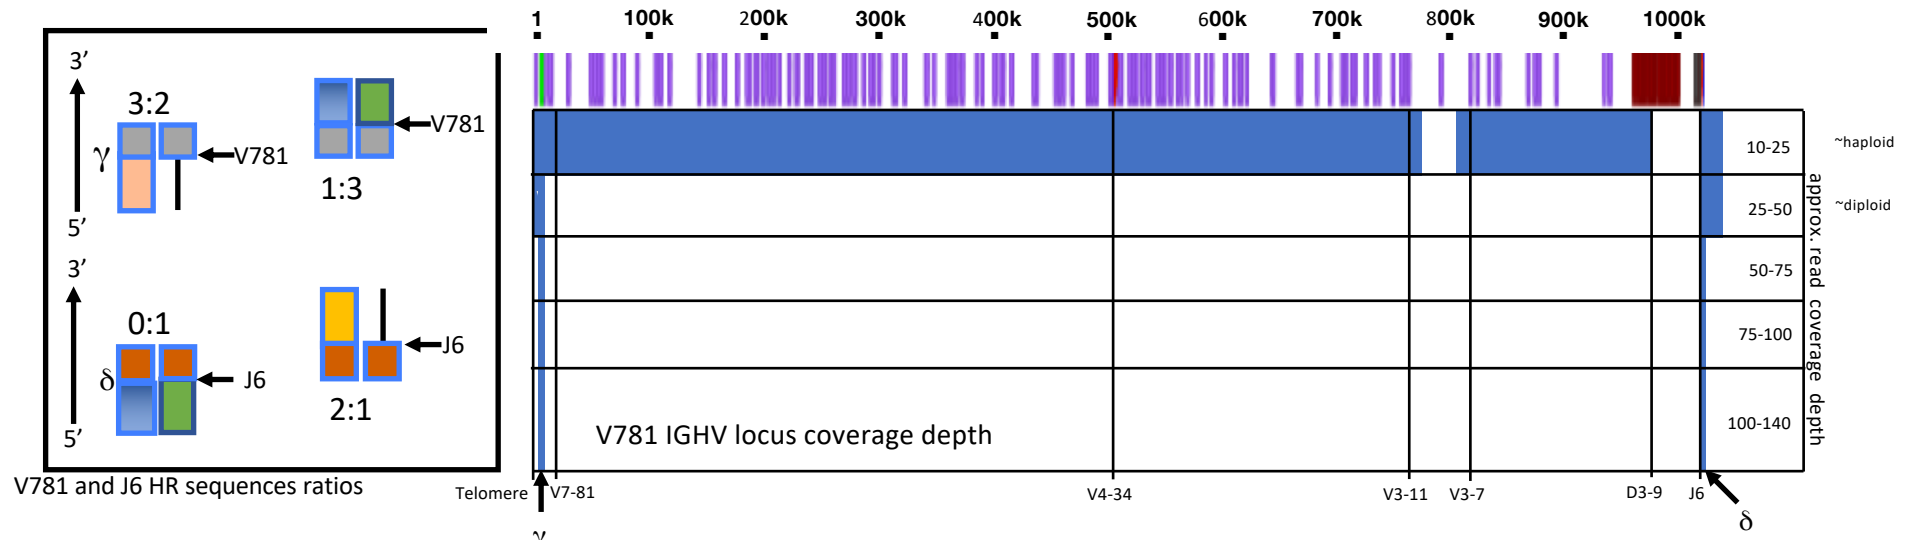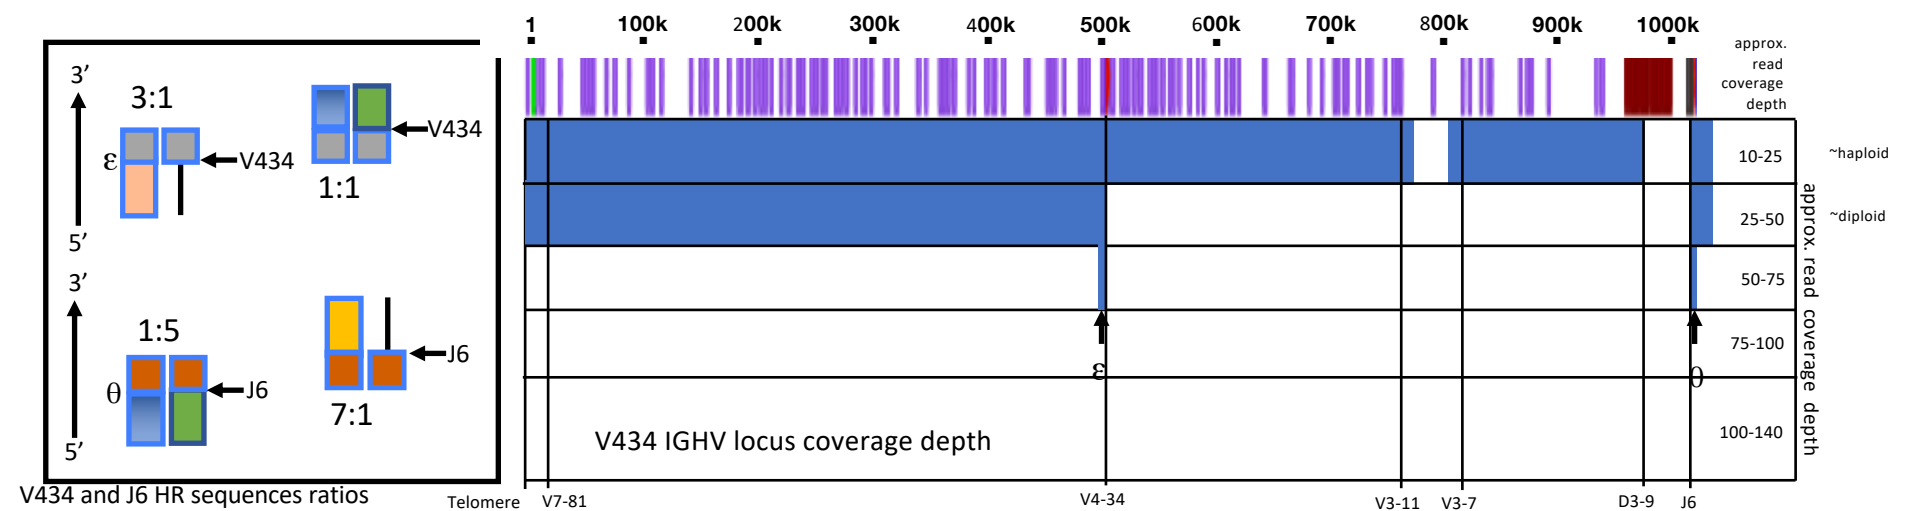

Supplement: supp [file elife-42995-supp-v1.zip › elife_poa_e42995_Figure_2_figure_supplement_7.pdf]

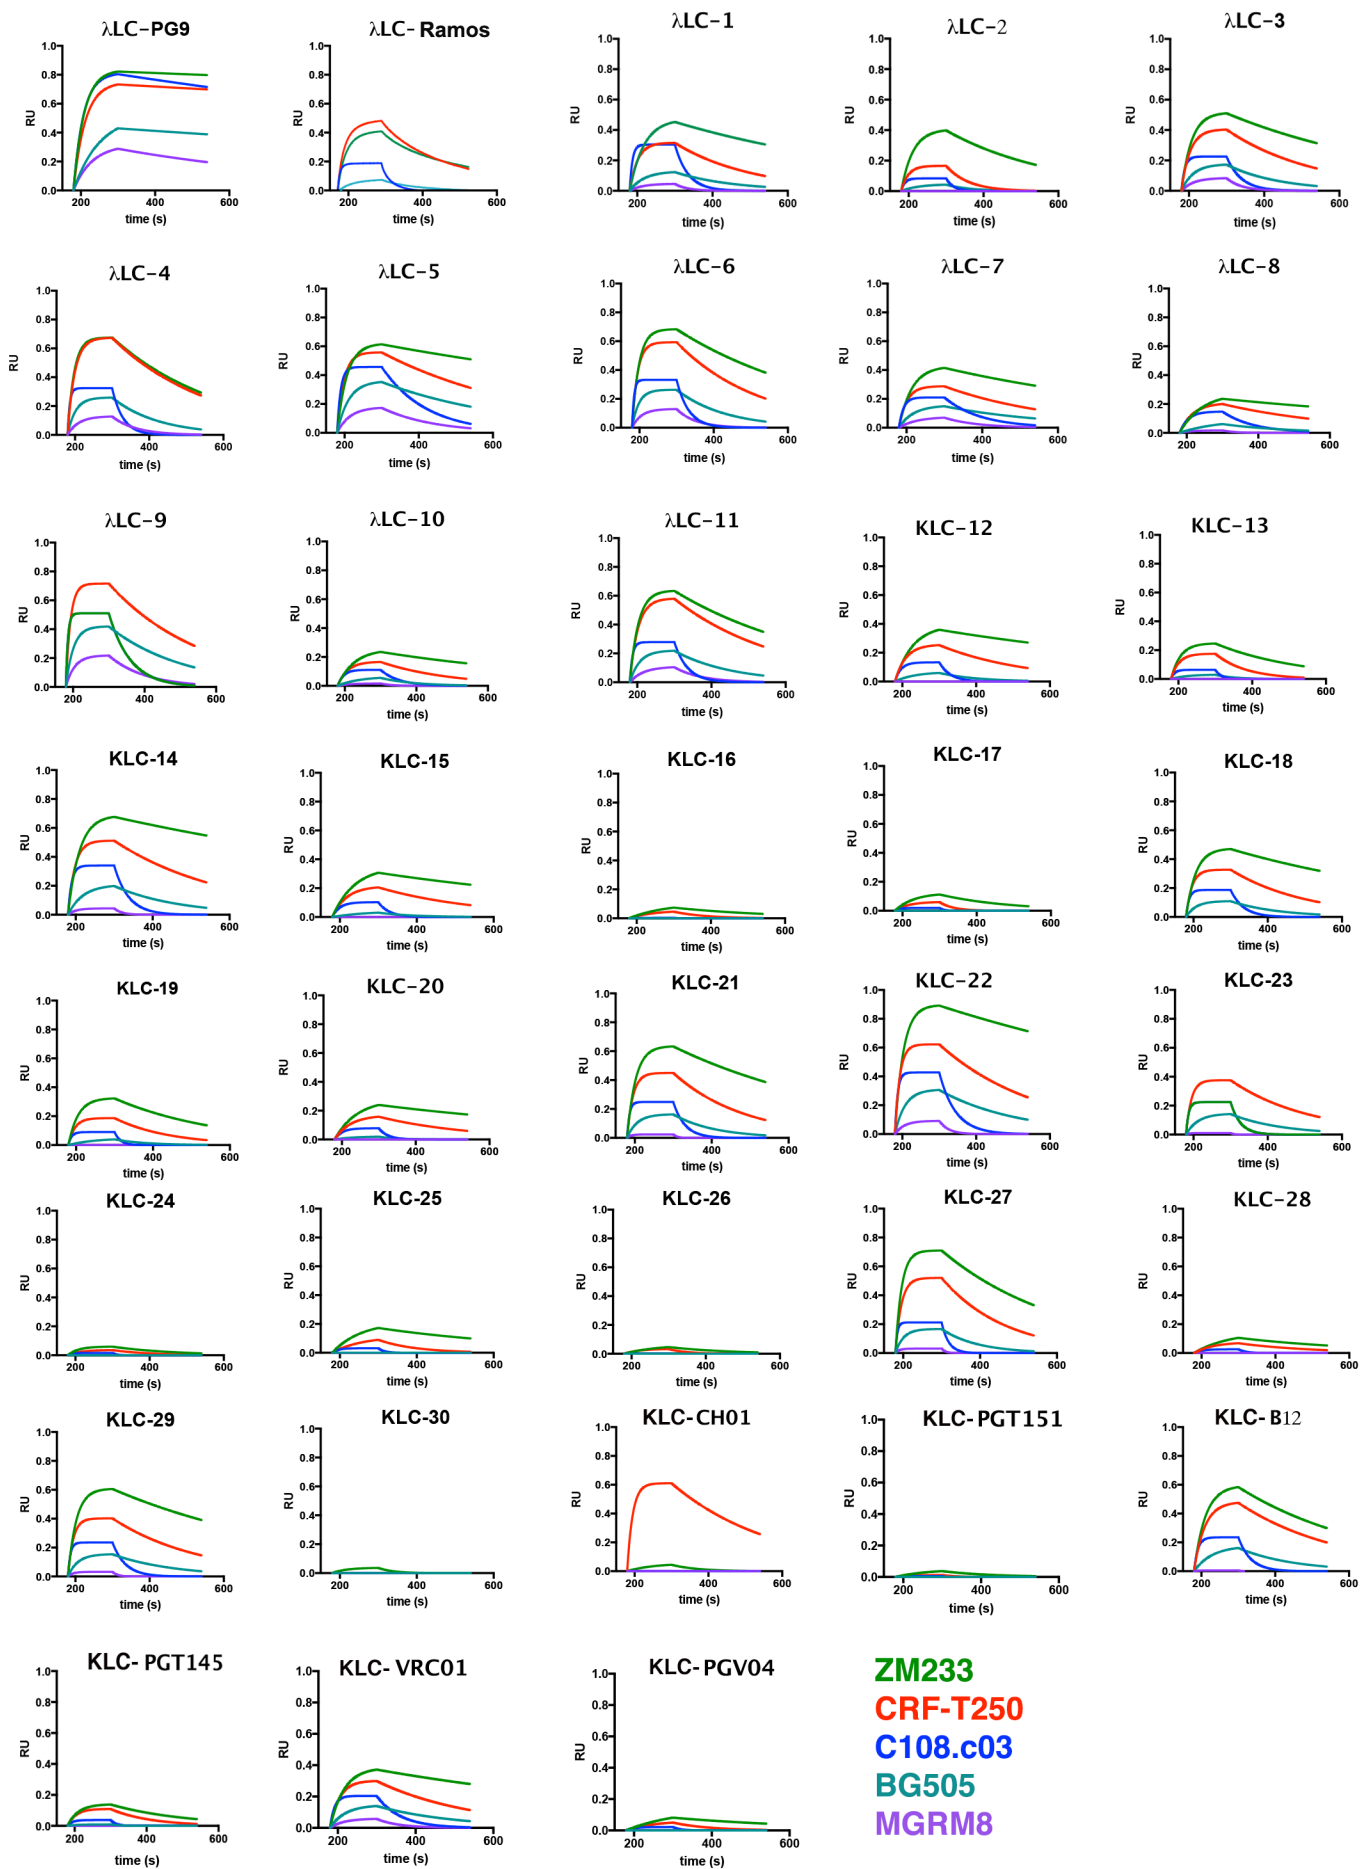

Supplement: supp [file elife-42995-supp-v1.zip › elife_poa_e42995_Figure_1_figure_supplement_3.pdf]

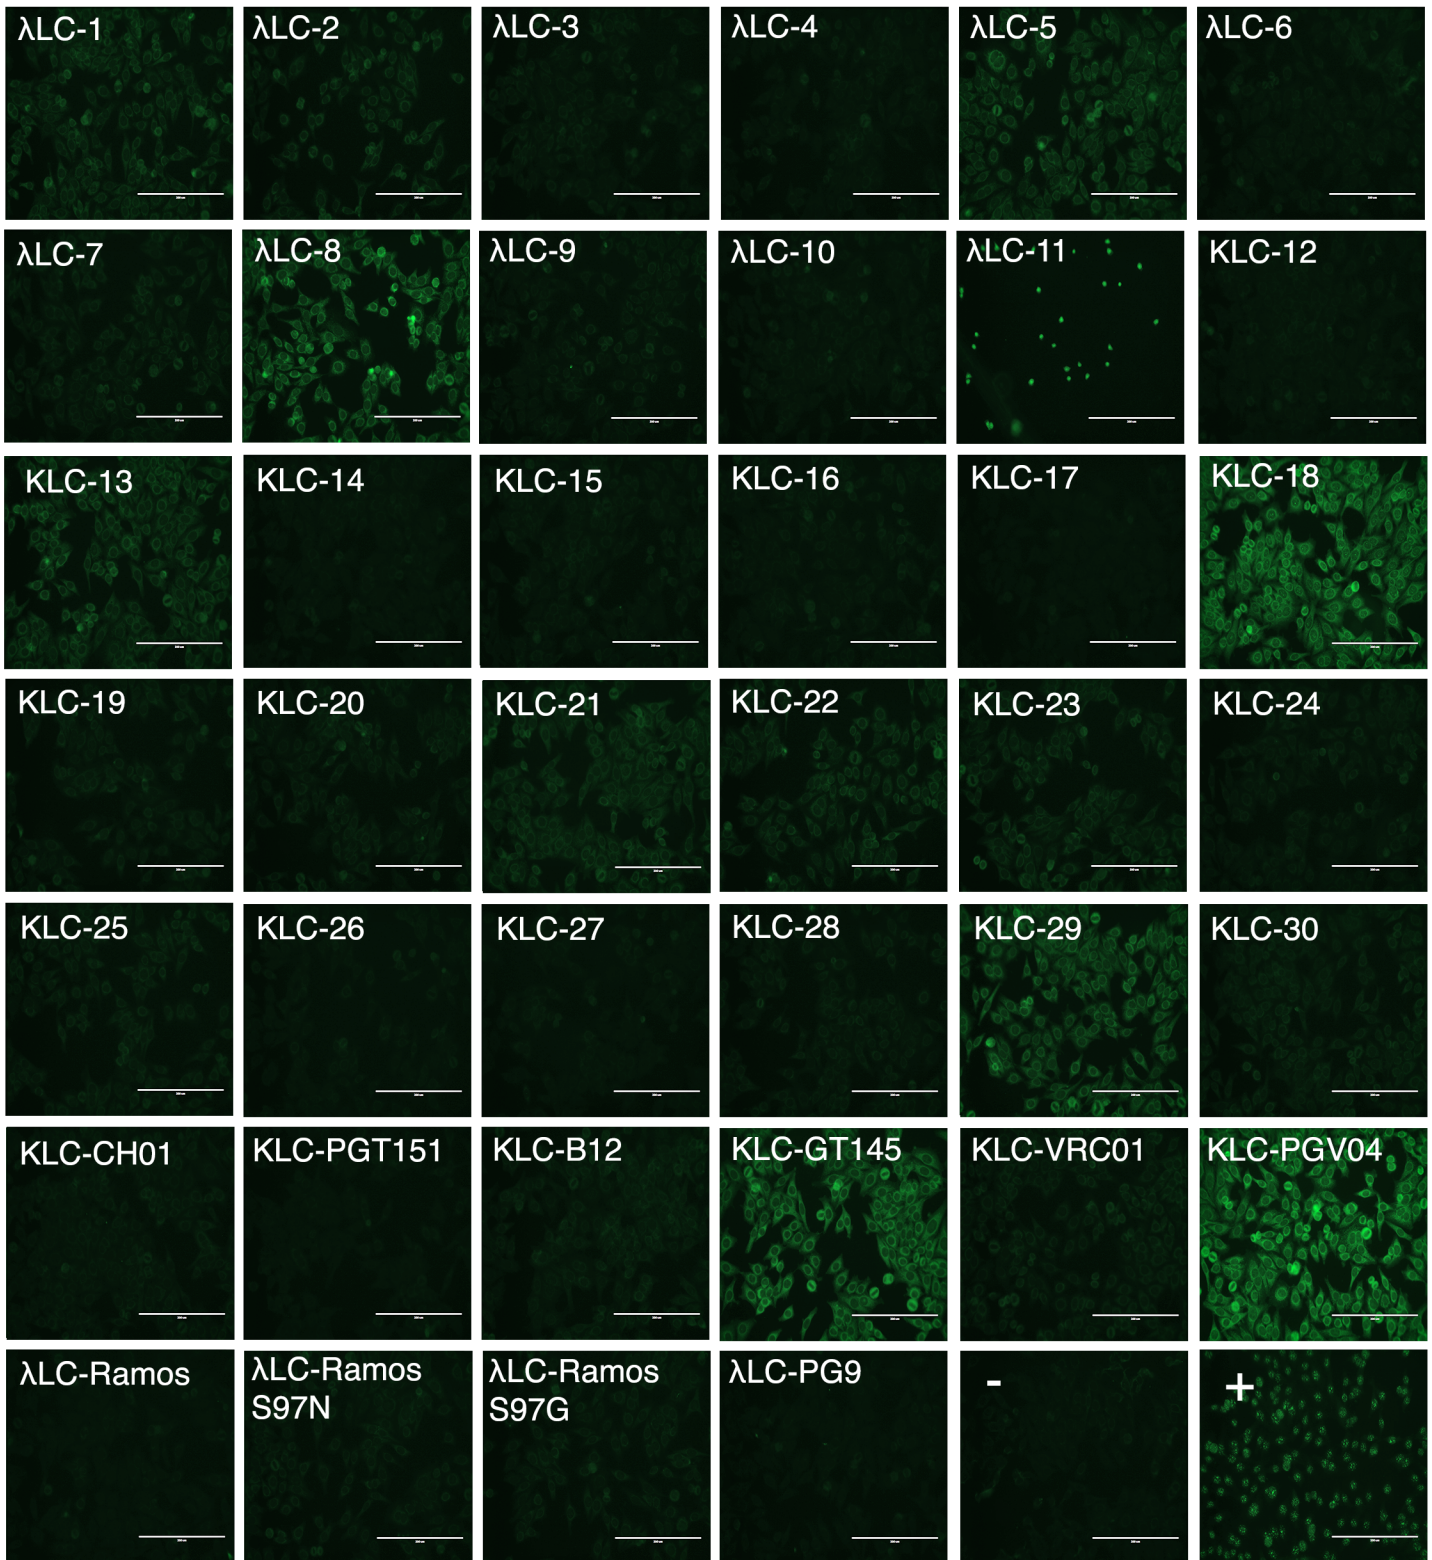

Supplement: supp [file elife-42995-supp-v1.zip › elife_poa_e42995_Figure_1_figure_supplement_4.pdf]

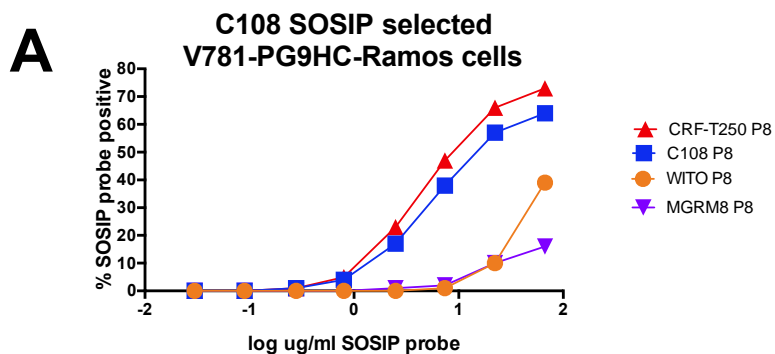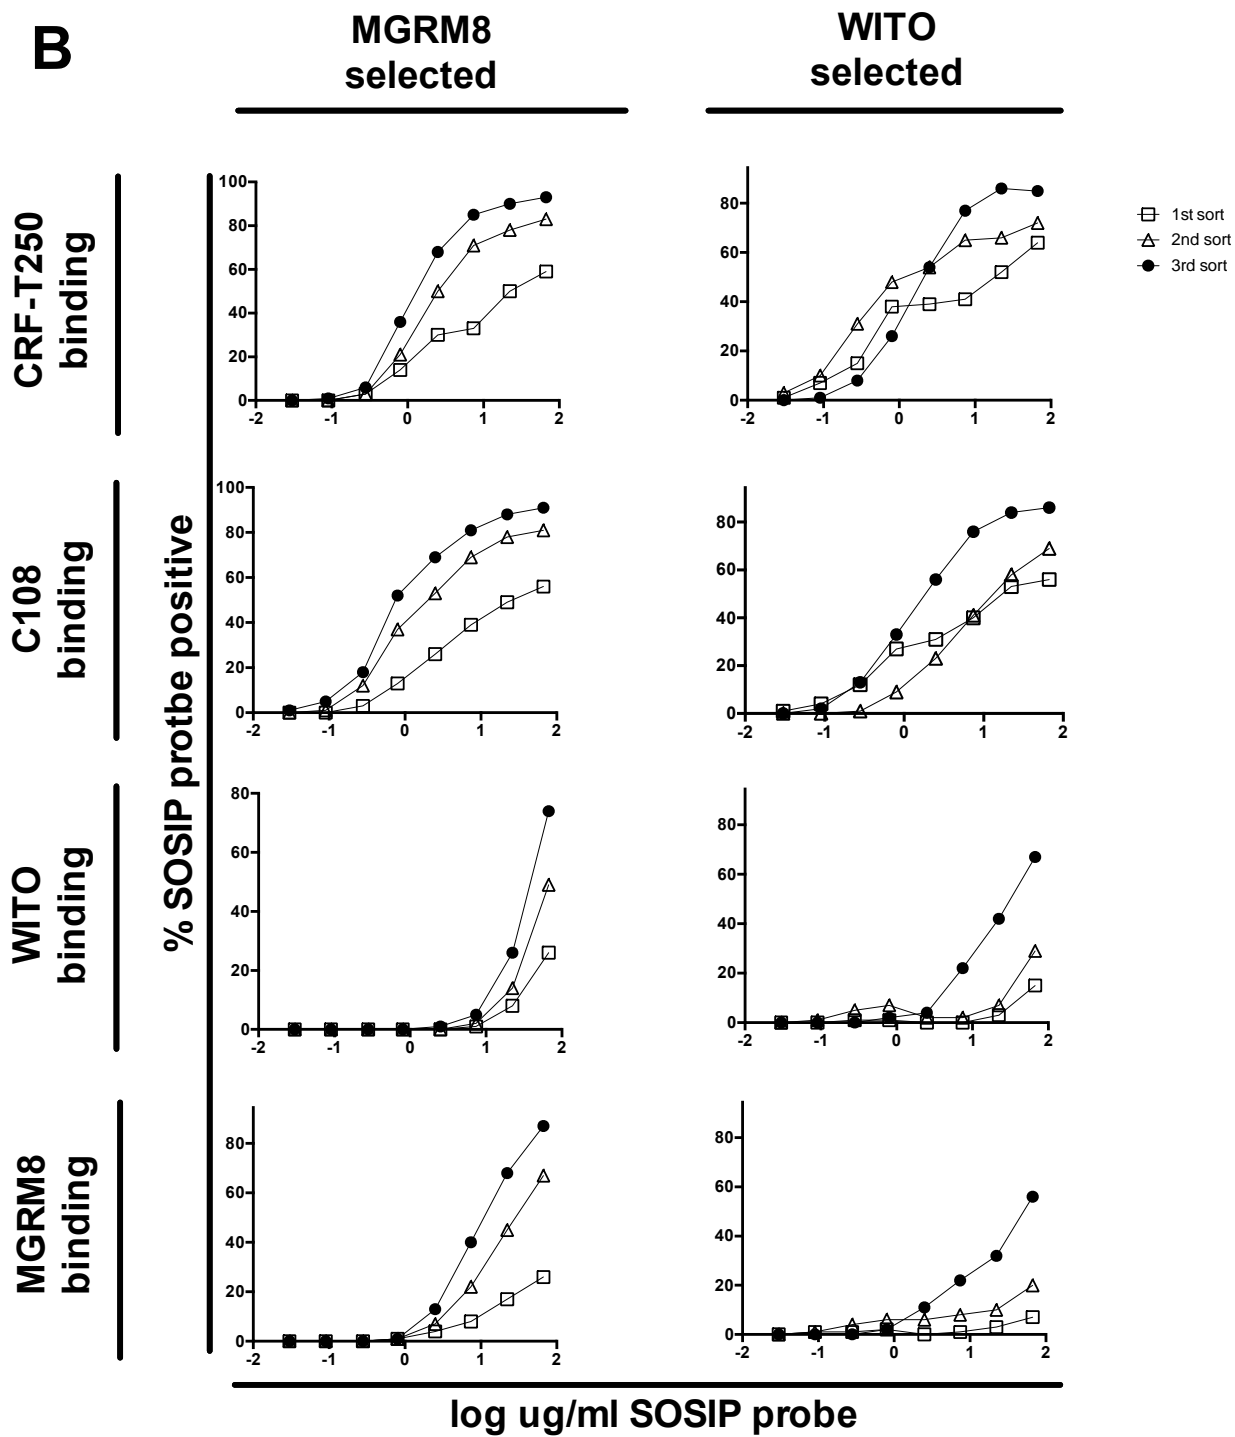

Supplement: supp [file elife-42995-supp-v1.zip › elife_poa_e42995_Figure_3_figure_supplement_1.pdf]

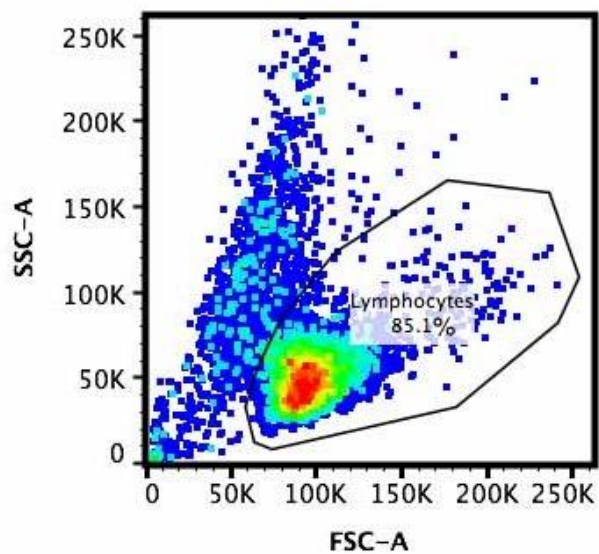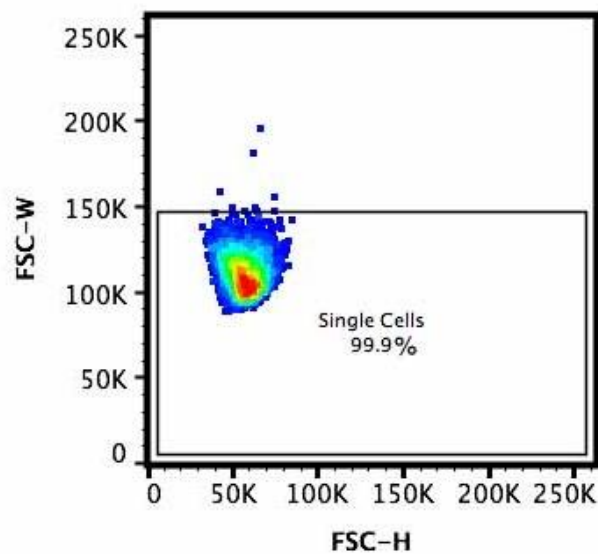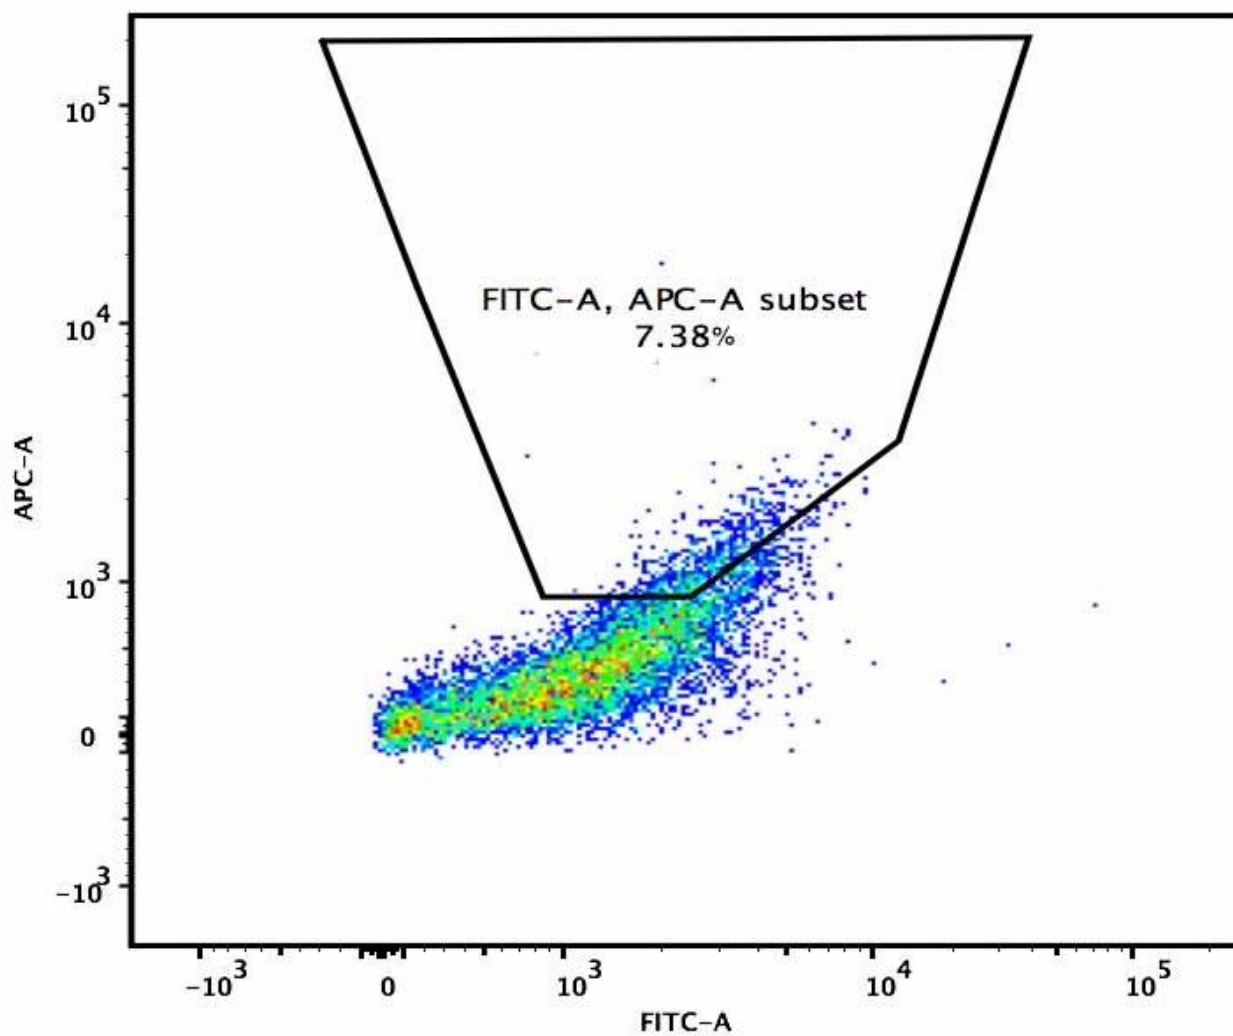

Supplement: supp [file elife-42995-supp-v1.zip › elife_poa_e42995_Figure_3_figure_supplement_2.pdf]

# V4-34 strategy

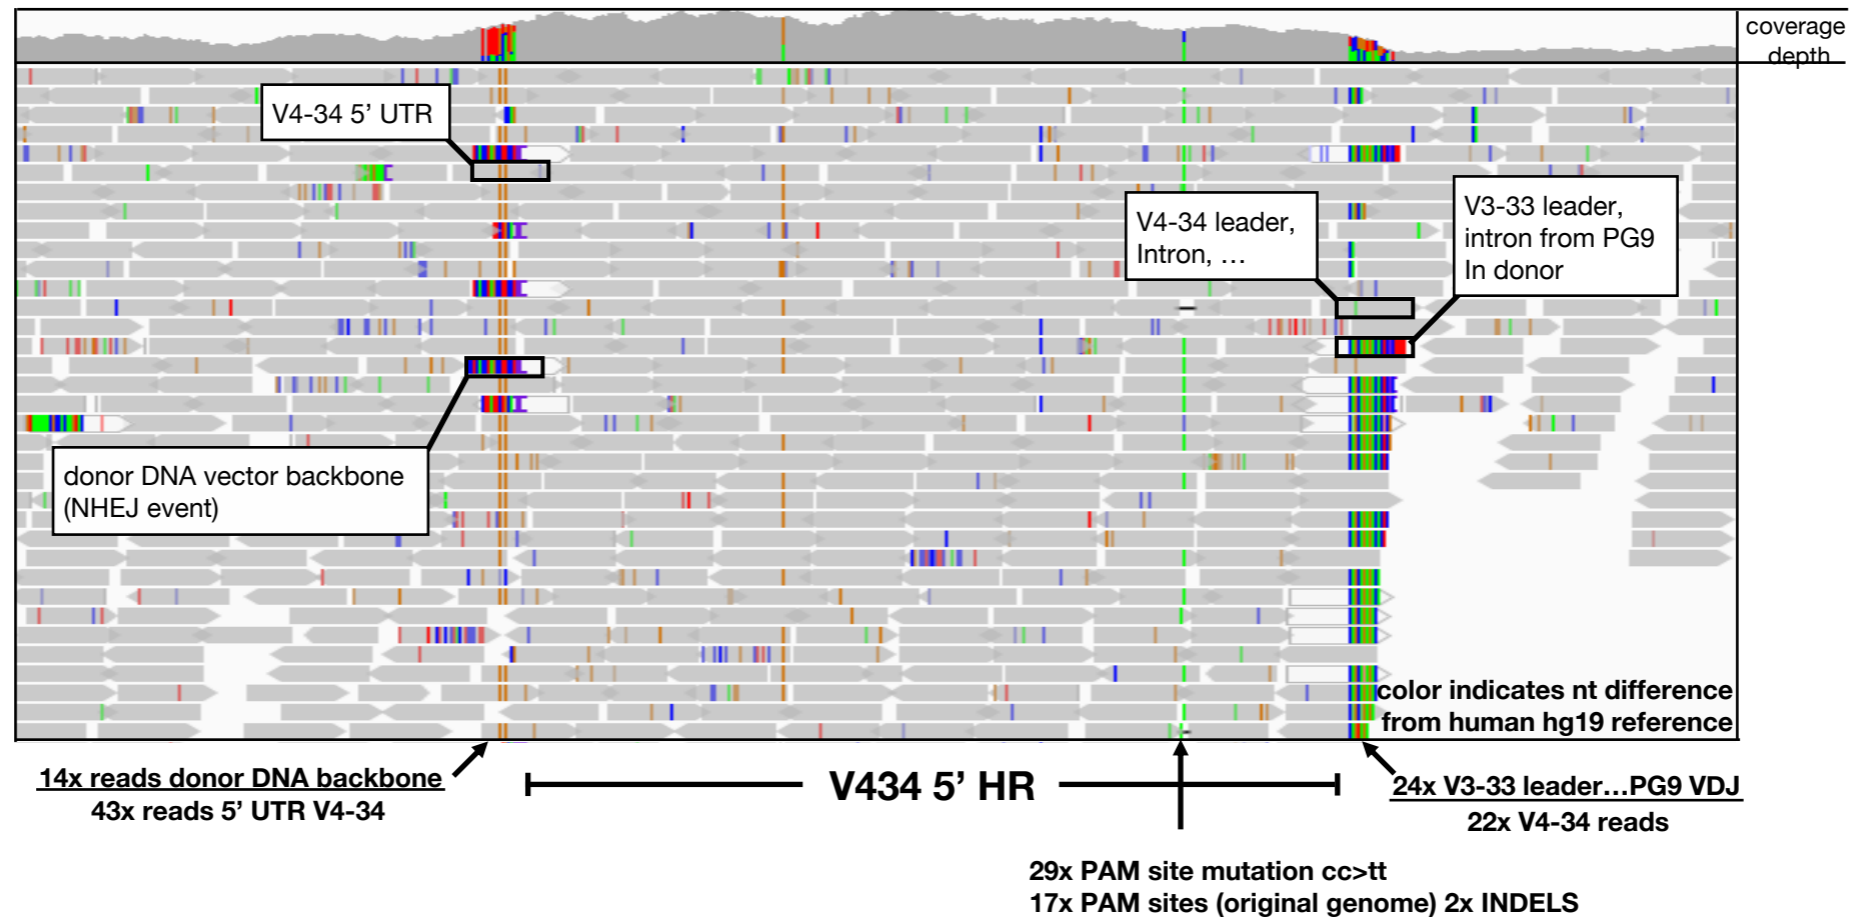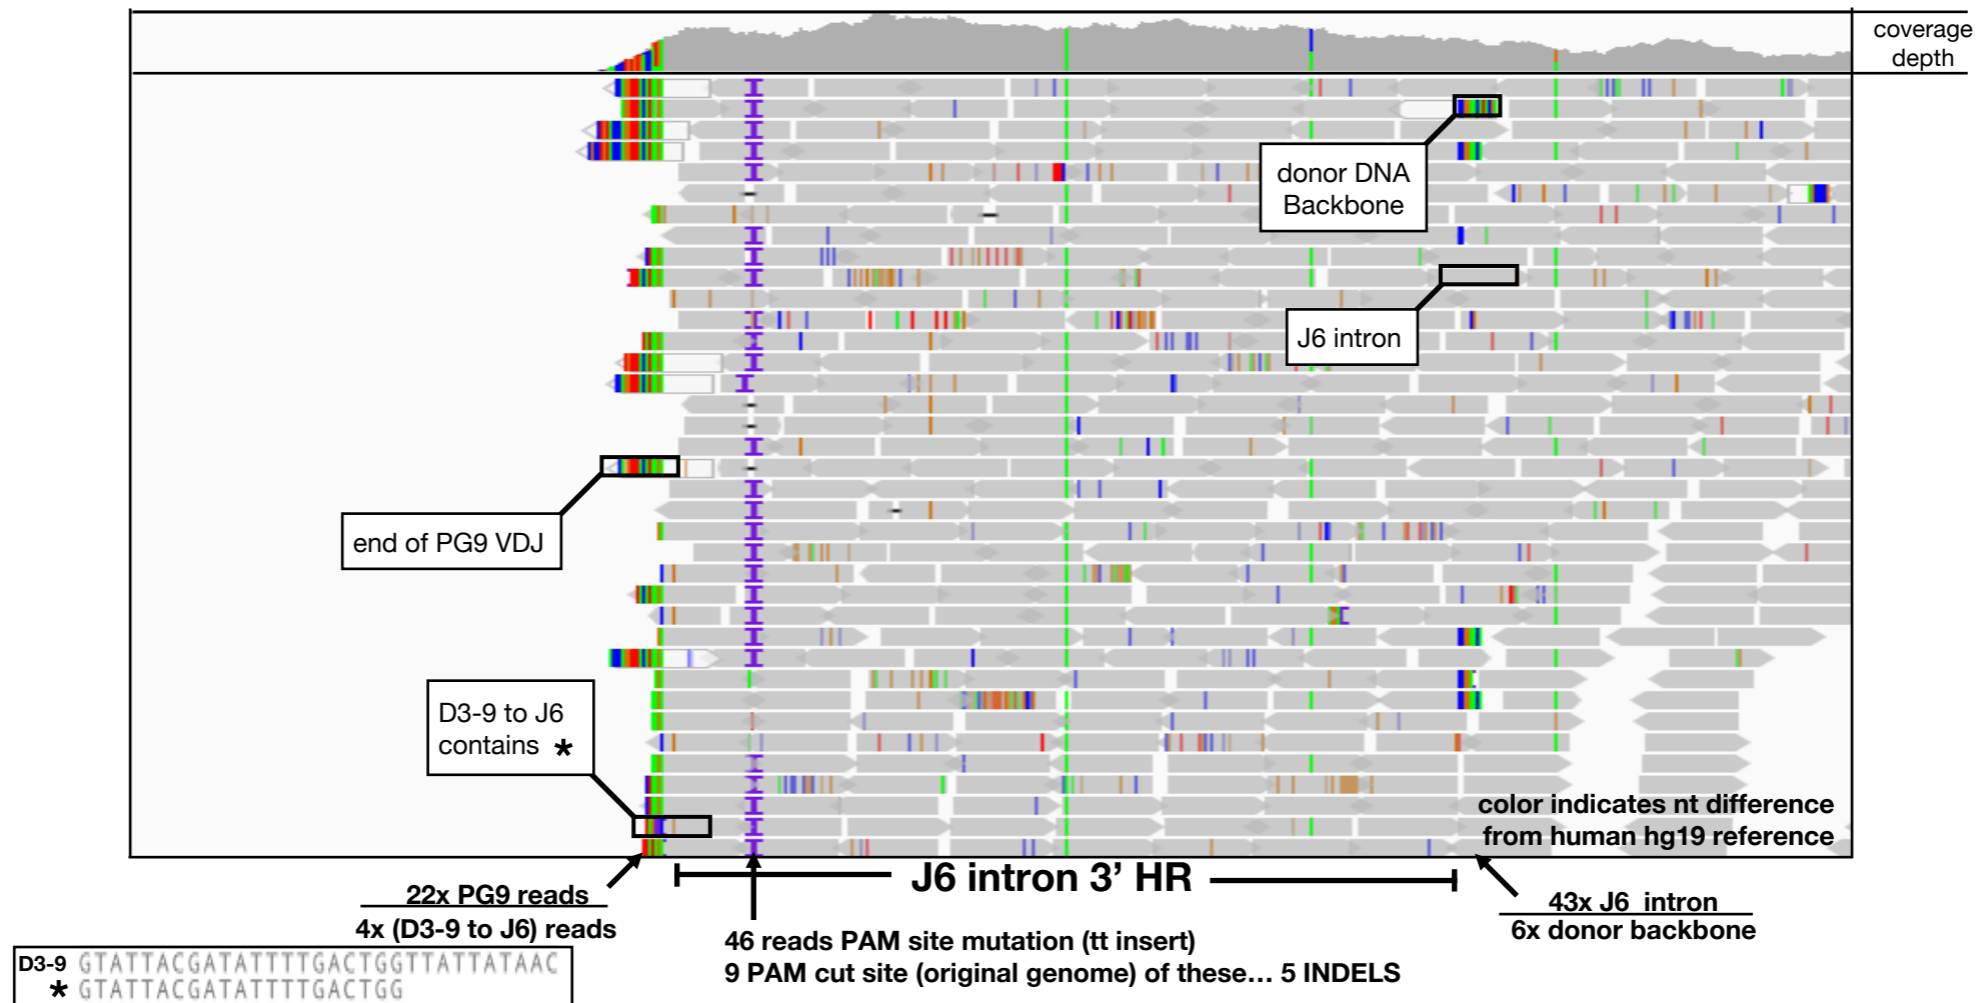

Supplement: supp [file elife-42995-supp-v1.zip › elife_poa_e42995_Figure_2_figure_supplement_9.pdf]
